# Supplementary material for: Glyoxal fixation: An approach to solve immunohistochemical problem in neuroscience research
Source: PubMed Central journal article supplement — Sci Adv. 2023 Jul 14;9(28):eadf7084. doi: 10.1126/sciadv.adf7084 (PMC10348680; doi:10.1126/sciadv.adf7084), 2023-07-14
Supplement: sciadv.adf7084_sm.pdf [file sciadv.adf7084_sm.pdf]

Supplementary Materials for  
**Glyoxal fixation: An approach to solve immunohistochemical problem in  
neuroscience research**

Kohtarou Konno *et al.*

Corresponding author: Masahiko Watanabe, [watamasa@med.hokudai.ac.jp](mailto:watamasa@med.hokudai.ac.jp)

*Sci. Adv.* **9**, eadf7084 (2023)  
DOI: 10.1126/sciadv.adf7084

**This PDF file includes:**

Supplementary Text  
Figs. S1 to S18  
Tables S1 to S3  
References

In all supplemental figures, bars on each column represent SEM. \*\*\*\*,  $p < 0.0001$ ; \*\*\*,  $p < 0.0001$ ; \*\*,  $p < 0.001$ ; \*,  $p < 0.05$ ; n.s., statistically not significant. unpaired *t*-test or one-way ANOVA with post hoc Tukey test. For detailed statistics, see Table S2. *Abbreviations*. Cb, cerebellum; Cx, cortex; DG, dentate gyrus; GL, granular layer; Hi, hippocampus; Mb, midbrain; ML, molecular layer; MO, medulla oblongata; OB, olfactory bulb; PCL, Purkinje cell layer; Py, pyramidal cell layer; Ra, stratum radiatum; St, striatum; Th, thalamus; I~VI, cortical layer I through VI.

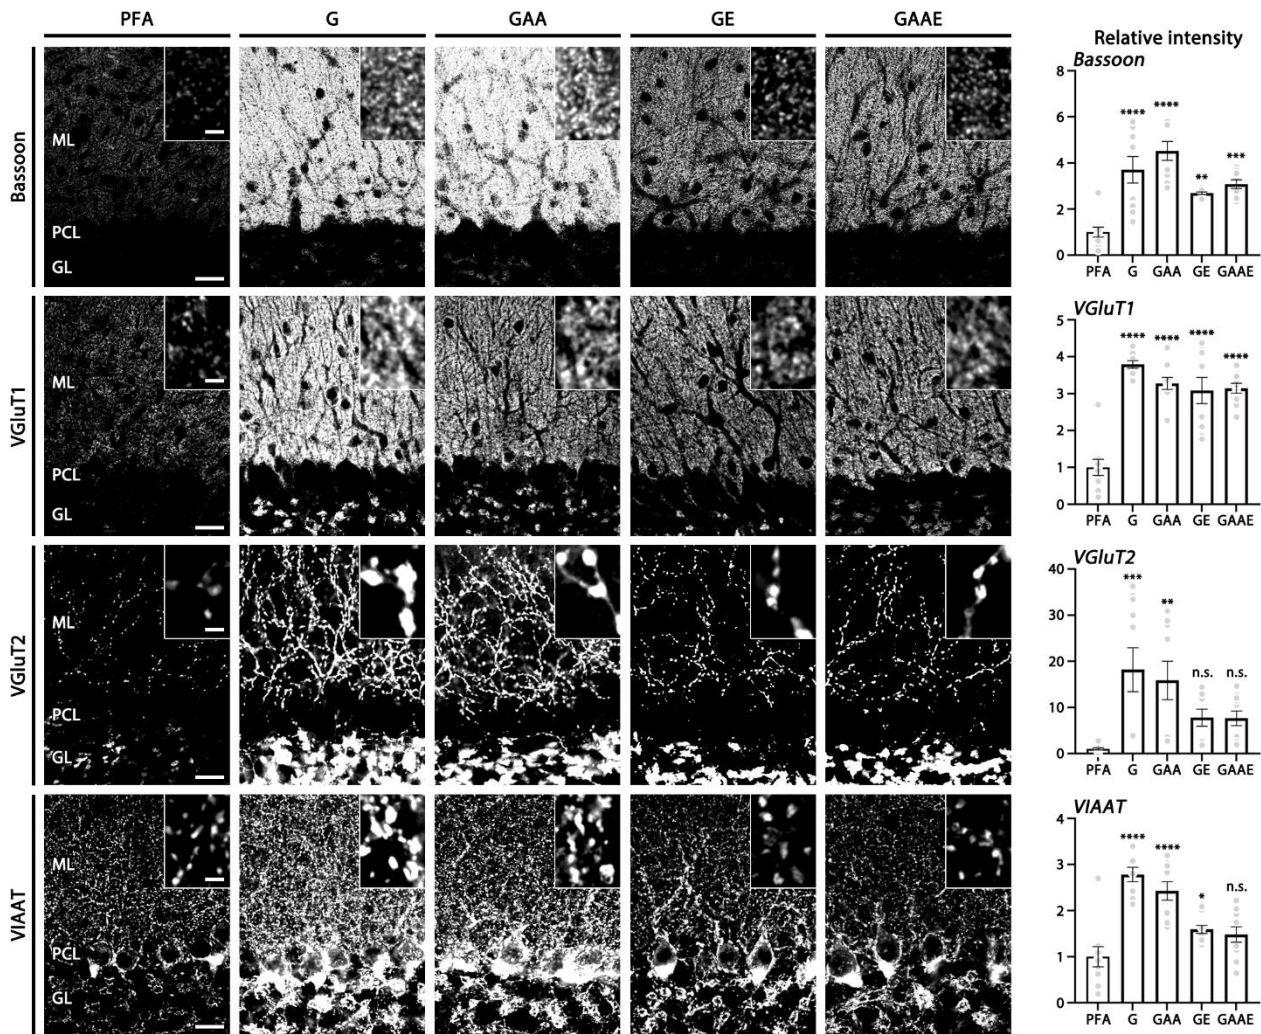

**Fig. S1. Intensified immunofluorescence signals for presynaptic molecules in glyoxal-fixed cerebellar cortex.** Immunofluorescence for Bassoon, vesicular glutamate transporters VGlut1 and VGlut2, and vesicular inhibitory amino acid transporter VIAAT in tissues fixed by 4% PFA or glyoxal with different composition: 3% glyoxal (G), 3% glyoxal/0.8% acetic acid (GAA), 3% glyoxal/20% EtOH (GE), and 3% glyoxal/0.8% acetic acid/20% ethanol (GAAE). Insets indicate magnified punctate images in the molecular layer. Histograms showing the mean relative fluorescent intensity in each glyoxal fixative normalized to that in 4% PFA. Each data was calculated from 10 images per mouse ( $n = 2$  mice). Scale bars, 20  $\mu\text{m}$ ; insets, 2  $\mu\text{m}$ .

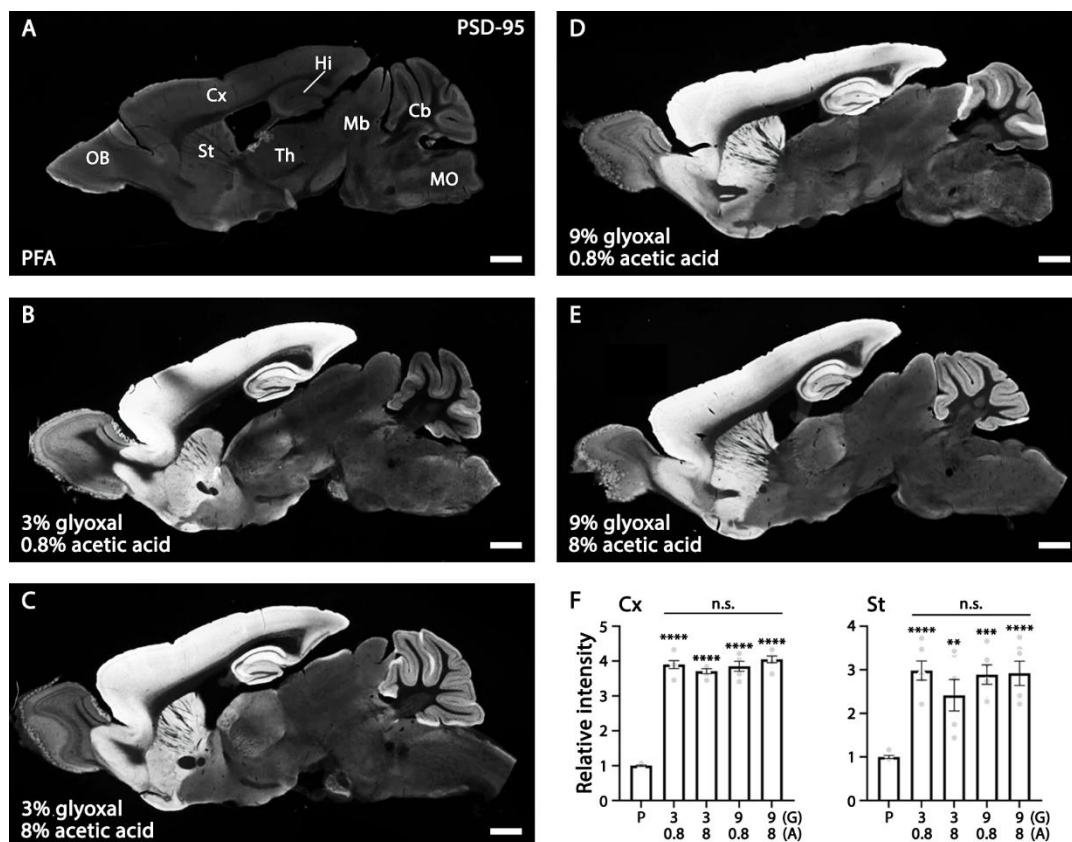

**Fig. S2. Effect of glyoxal/acetic acid (GAA) fixative with different concentrations on PSD-95 immunofluorescence in parasagittal brain sections.** (A to E) 4% PFA (A), 3% glyoxal (G)/0.8% acetic acid (A) (B), 3% glyoxal/8% acetic acid (C), 9% glyoxal/0.8% acetic acid (D), and 9% glyoxal/8% acetic acid (E). (F) Histograms showing the mean relative fluorescent intensity in respective glyoxal fixatives in the somatosensory cortex (left) and striatum (right) normalized to that in 4% PFA. Each data was calculated from 3 images per mouse ( $n = 2$  mice). Significant intensification is noted between 4% PFA and each of four GAA fixatives with different concentrations, but not among four glyoxal fixatives. Scale bars, 1 mm.

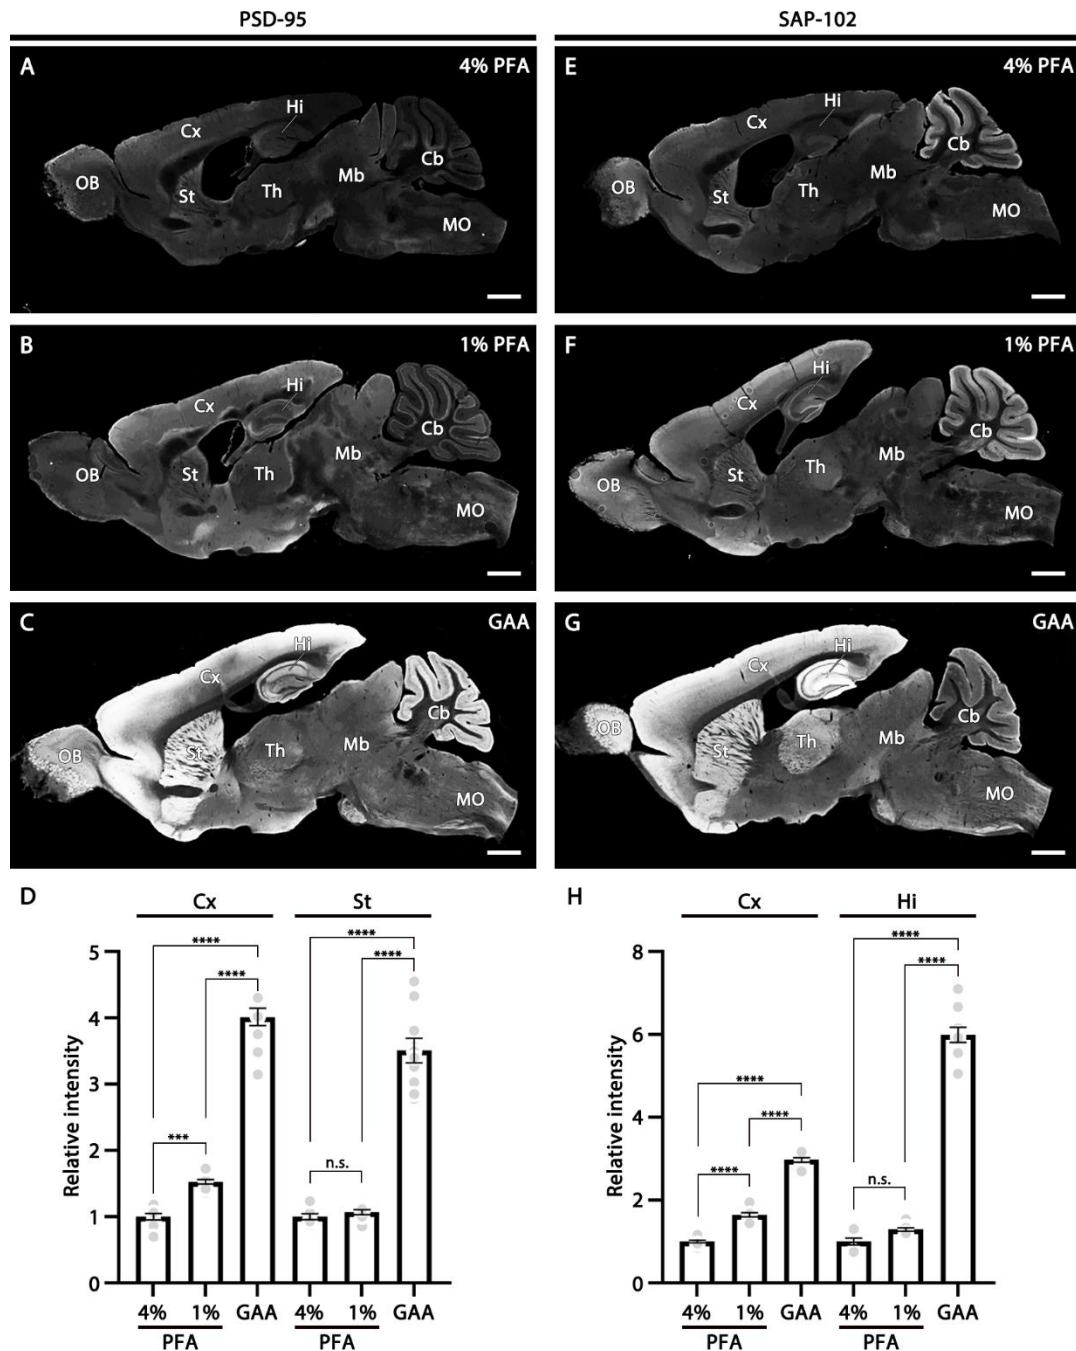

**Fig. S3. 9% glyoxal/8% acetic acid (GAA) is superior to low concentration (1%) PFA in immunofluorescence for excitatory postsynaptic scaffolding proteins.** (A to C) Immunofluorescence for PSD-95 in parasagittal brain sections fixed by 4% PFA (A), 1% PFA (B), and GAA (C). (E to G) Immunofluorescence for SAP-102 in parasagittal brain sections fixed by 4% PFA (E), 1% PFA (F), and GAA (G). (D and H) Histograms showing the mean relative intensity for PSD-95 (D) and SAP-102 (H) in the somatosensory cortex (Cx), striatum (St), and

hippocampus (Hi). The intensity in 1% PFA- and GAA-fixed sections are normalized to that in 4% PFA-fixed sections. Each data was calculated from 5 images per mouse (n = 2 mice). Scale bars, 1 mm.

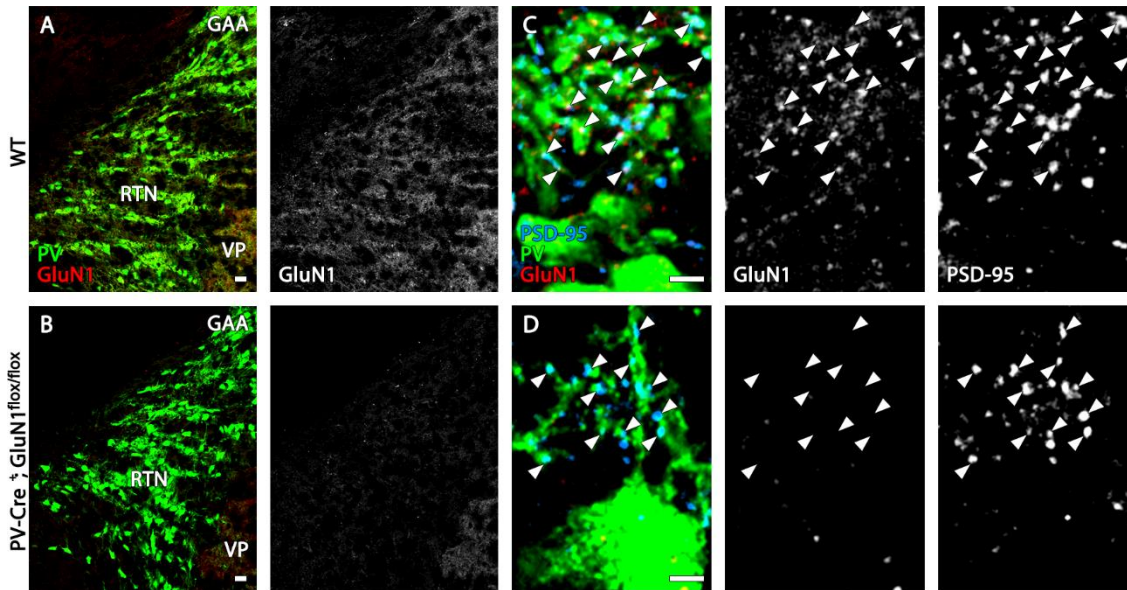

**Fig. S4. The specificity of GluN1 immunohistochemistry in GAA-fixed brains.** Immunofluorescence for parvalbumin (PV) and GluN1 (**A, B**) and for PV, GluN1, and PSD-95 (**C, D**) in the reticular thalamic nucleus (RTN) of wild-type (**A, C**) and PV-Cre<sup>+</sup>; GluN1<sup>flox/flox</sup> (**B, D**) mouse brains. In wild-type RTN, GluN1 is detected as punctate labeling on PV(+) dendrites and overlapped with PSD-95 (arrowheads). The absence of GluN1 immunostaining on PSD-95(+) synapses on PV(+) dendrites in PV-Cre<sup>+</sup>; GluN1<sup>flox/flox</sup> mouse verifies the specificity of GluN1 labeling in GAA-fixed sections. Arrowheads indicate PSD-95(+) excitatory synapses on PV(+) dendrites. RTN, reticular thalamic nucleus; VP, ventral posterior nucleus of the thalamus. Scale bars, **A** and **B**, 20  $\mu$ m; **C** and **D**, 2  $\mu$ m.

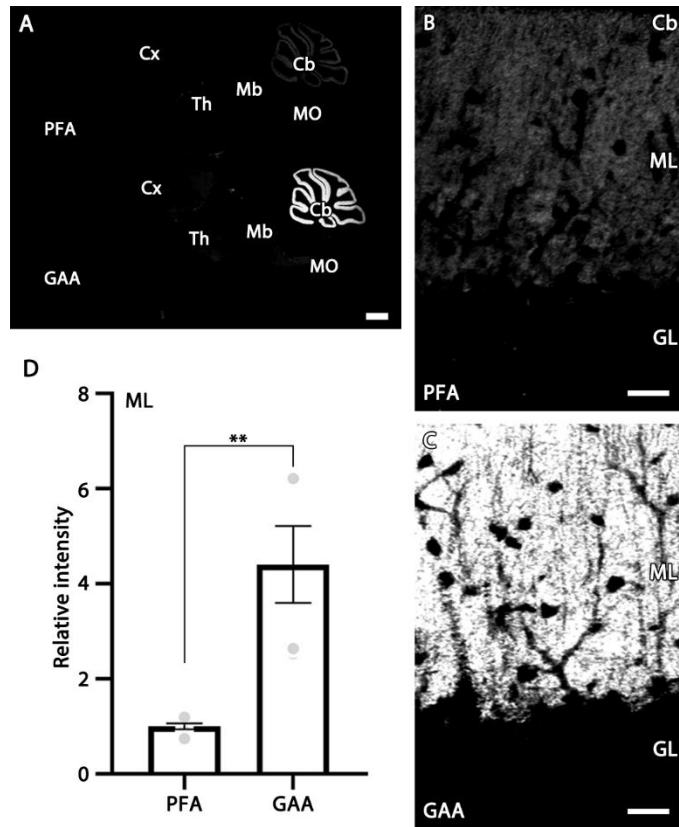

**Fig. S5. Glyoxal fixation improves immunofluorescence using paraffin sections.** (A) Immunofluorescence for GluD2 in parasagittal brain sections. Brains fixed by 4% PFA (upper) and 9% glyoxal/8% acetic acid (GAA, lower) were embedded in the same paraffin block. Both sections were mounted on the same glass slide and incubated in the same drops of antibody solution. (B and C) Magnified images of the cerebellar cortex (B, PFA; C, GAA) taken from A. (D) Histogram showing the mean relative intensity of GluD2 signals in the cerebellar molecular layer. The relative intensity in GAA fixation was normalized to that in PFA fixation. Each data was calculated from 3 images per mouse (n = 2 mice). Scale bars, A, 1 mm; B and C, 20  $\mu$ m.



PFA (without pepsin pretreatment), z-axis: 0  $\mu\text{m}$

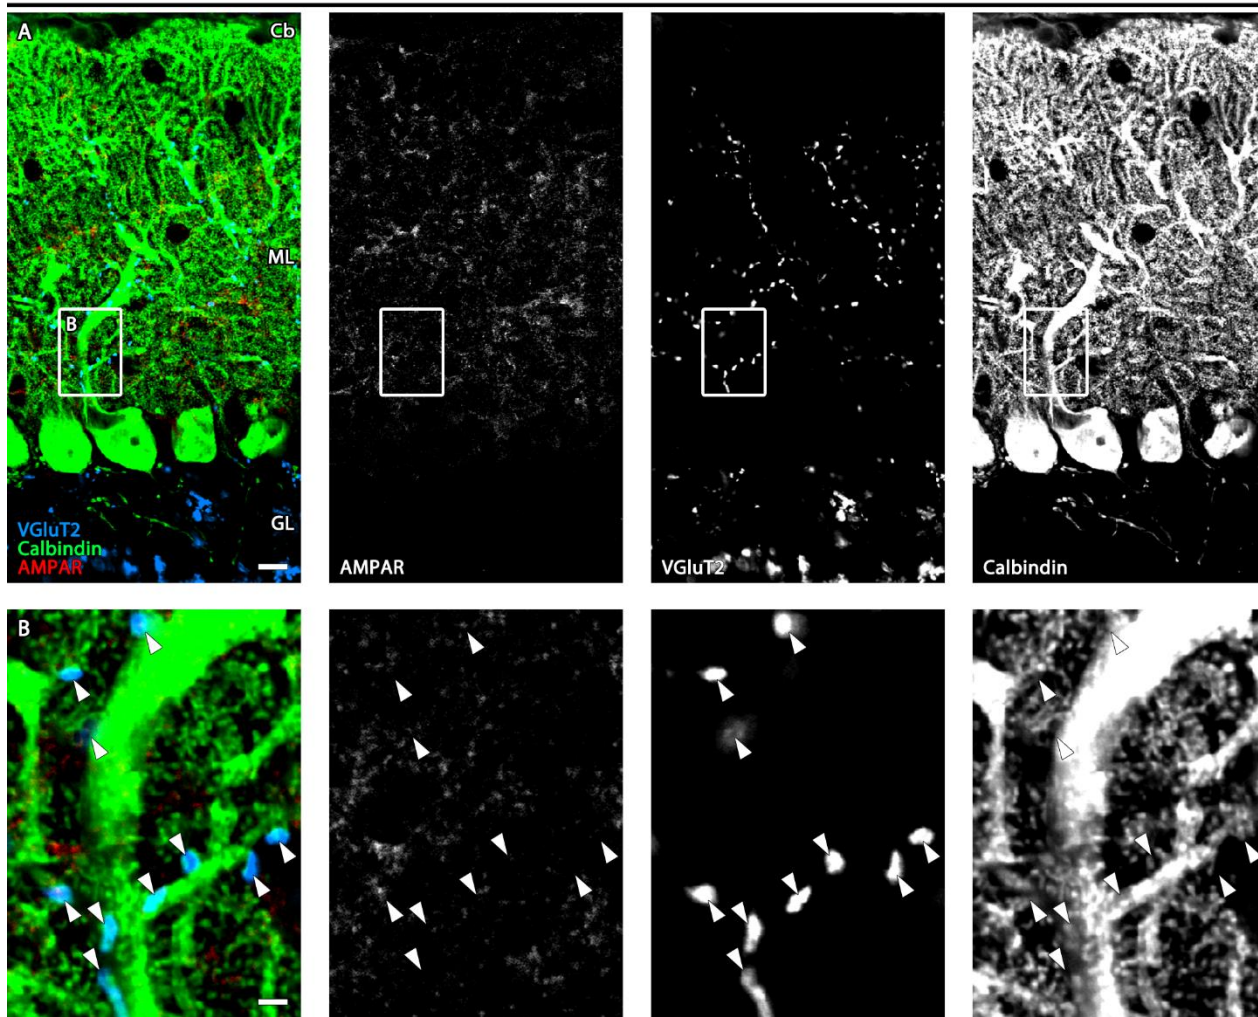

**Fig. S6. Detection of glial, but not synaptic, AMPAR in PFA-fixed pepsin-untreated sections.**

Triple immunofluorescence for AMPAR (red; pan-AMPA antibody), VGlut2 (blue), and calbindin (green) in the cerebellar cortex. A boxed region in **A** is magnified in **B**. Arrowheads indicate VGlut2(+) climbing fiber terminals in contact with Purkinje cell dendrites. Note weak AMPAR labeling is detected in calbindin(-) neuropil, but not at climbing fiber-Purkinje cell synapses, suggesting detection of glial, not synaptic, AMPA in PFA-fixed pepsin-untreated sections.

Scale bars, **A**, 10  $\mu\text{m}$ ; **B**, 2  $\mu\text{m}$ .

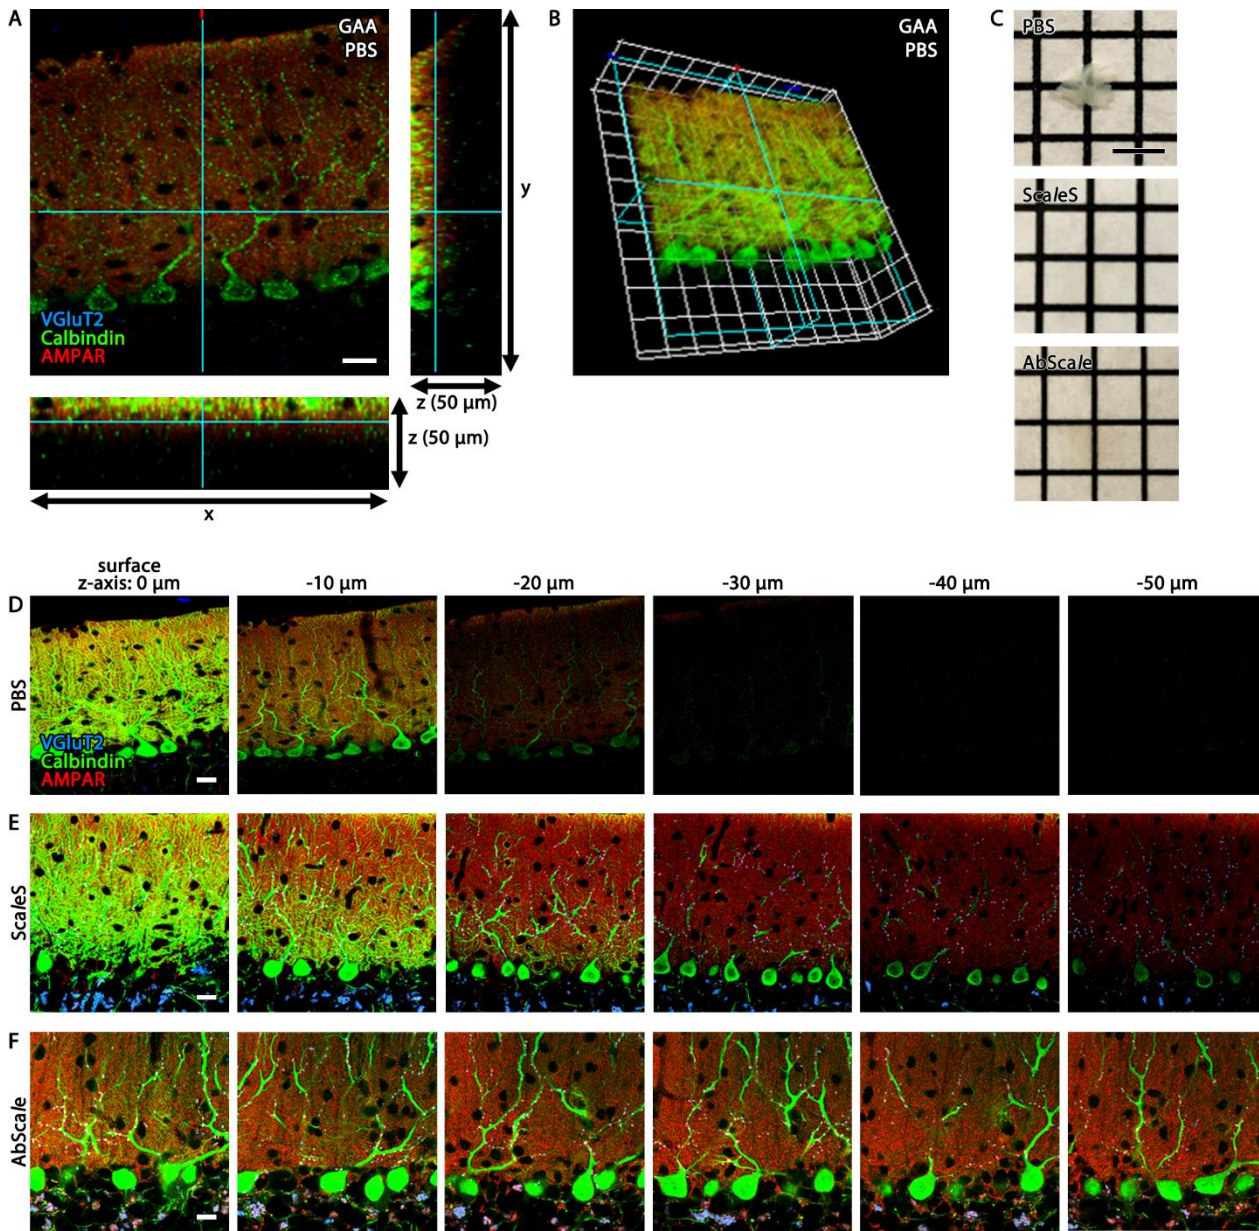

**Fig. S7. Deep z-axis imaging for AMPAR as well as for VGluT2 and calbindin.** Immunofluorescence for AMPAR (red), VGluT2 (blue), and calbindin (green) was applied to GAA-fixed 100  $\mu\text{m}$ -thick cerebellar sections (**A**, **B**, **D** to **F**). (**A** and **B**) The  $xy$ ,  $xz$ , and  $yz$  planes of images (**A**) and 3D images (**B**), which were untreated with tissue clearing methods and reconstructed from consecutive images along the  $z$ -axis (1.0  $\mu\text{m}$  step). (**C**) GAA-fixed 100  $\mu\text{m}$ -thick cerebellar sections without (upper, PBS) or with treatment of the tissue clearing by ScaleS (middle) or AbScale (lower). (**D** to **F**) Consecutive triple immunofluorescence images in GAA-fixed cerebellar sections treated without (**D**) or with ScaleS after immunoreaction (**E**) or AbScale during immunoreaction (**F**). Consecutive images were captured along the  $z$ -axis by 1  $\mu\text{m}$  step, and

images at 0, 10, -20, -30, -40, and -50  $\mu\text{m}$  deep from the surface are shown in this panel. Scale bars, **C**, 3 mm; **A**, **D** to **F**, 20  $\mu\text{m}$ .

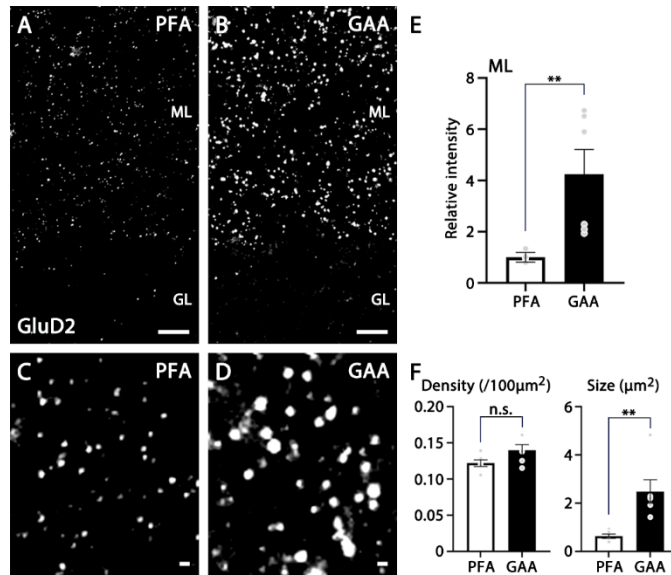

**Fig. S8. GAA fixation increases the intensity of individual signals, as assessed by post-embedding immunofluorescence for GluD2 in the cerebellar cortex. (A to D)** Immunofluorescence for GluD2 in Lowicryl-embedded ultrathin sections fixed by PFA (A and B) or GAA (C and D). (E) Histogram showing significant increase in the mean relative intensity of GluD2 in the cerebellar molecular layer by GAA fixation normalized to PFA fixation. Each value was calculated from 3 images per mouse (n = 2 mice). (F) Histograms showing that the size (right), but not density (left), of fluorescent signals is significantly increased by GAA fixation, as compared to PFA fixation. Each value was calculated from 3 images per mouse (n = 2 mice). Scale bars, A and B, 10 μm, C and D, 1 μm.

**Fig. S9–S18.** Comparisons of immunofluorescence detection for various categories of molecules in brain sections fixed by PFA (upper) and GAA (lower). For each molecule, left panels show overall staining patterns in parasagittal brain sections, while right panels show magnified images from representative regions of the brain. The mean relative intensity in PFA- and GAA-fixed representative regions was measured and normalized to that of PFA fixation, as indicated in individual Supplemental Figures. Each data was average of 5 images per mouse ( $n = 2$  mice) and the total measured area is  $0.14 \text{ mm}^2$ , unless otherwise noted. Scale bars, low-magnification left panels, 1 mm, high-magnification right panels, 2, 10, or  $50 \mu\text{m}$  (indicated in each Figure).

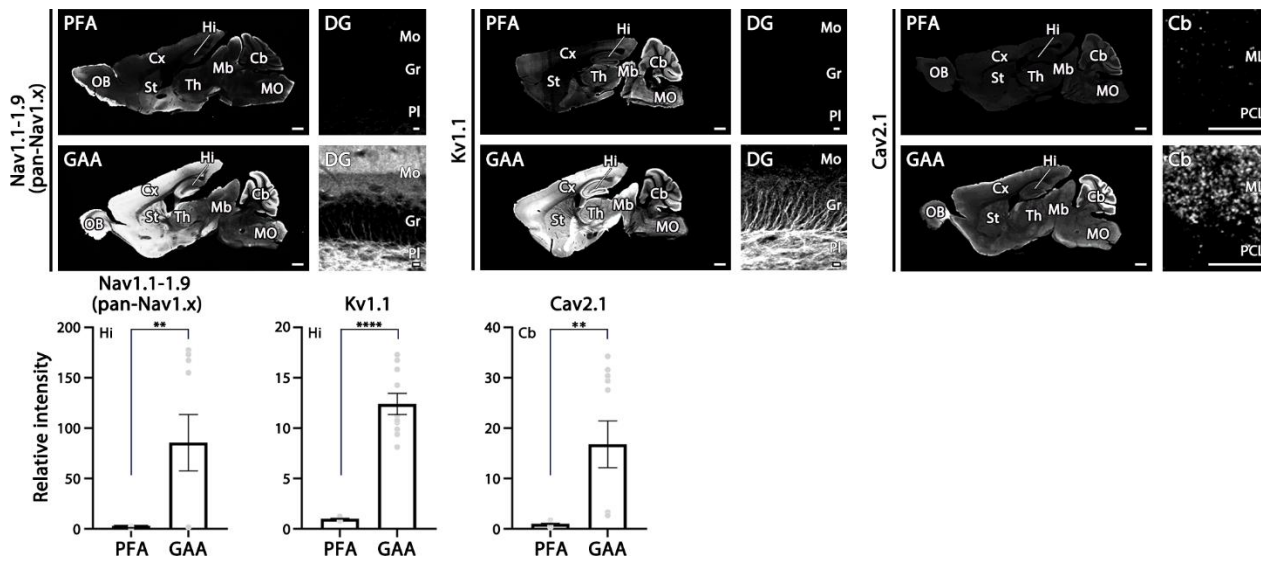

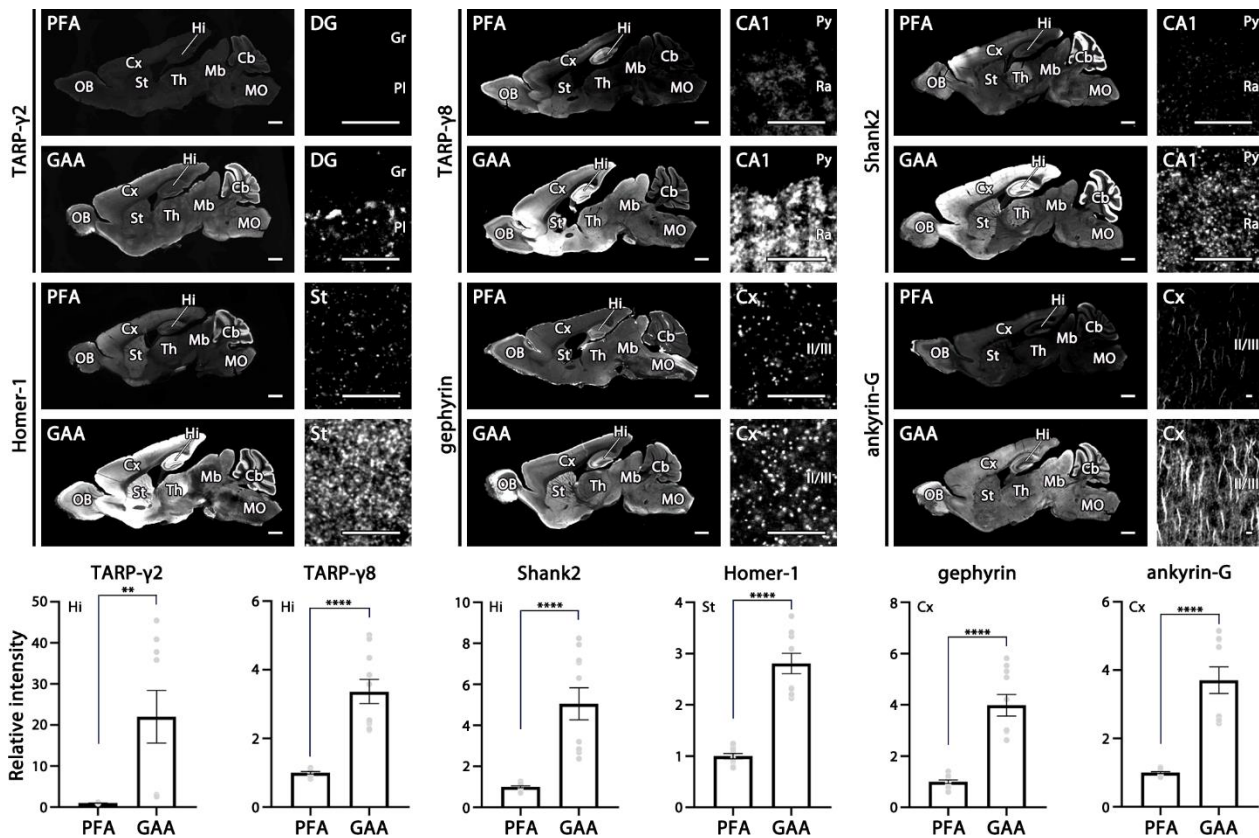

**Fig. S10. Ion channel/receptor-associated molecules.** The mean relative intensity is significantly increased by GAA fixation for transmembrane AMPA receptor regulatory protein- $\gamma$ 2 (TARP- $\gamma$ 2) in the hippocampal dentate gyrus, TARP- $\gamma$ 8 in the hippocampal CA1, Shank2 in the hippocampal CA1, Homer-1 in the striatum, gephyrin in the cortex, and ankyrin-G in the cortex. Scale bars for high-magnification right panels, 10  $\mu$ m.

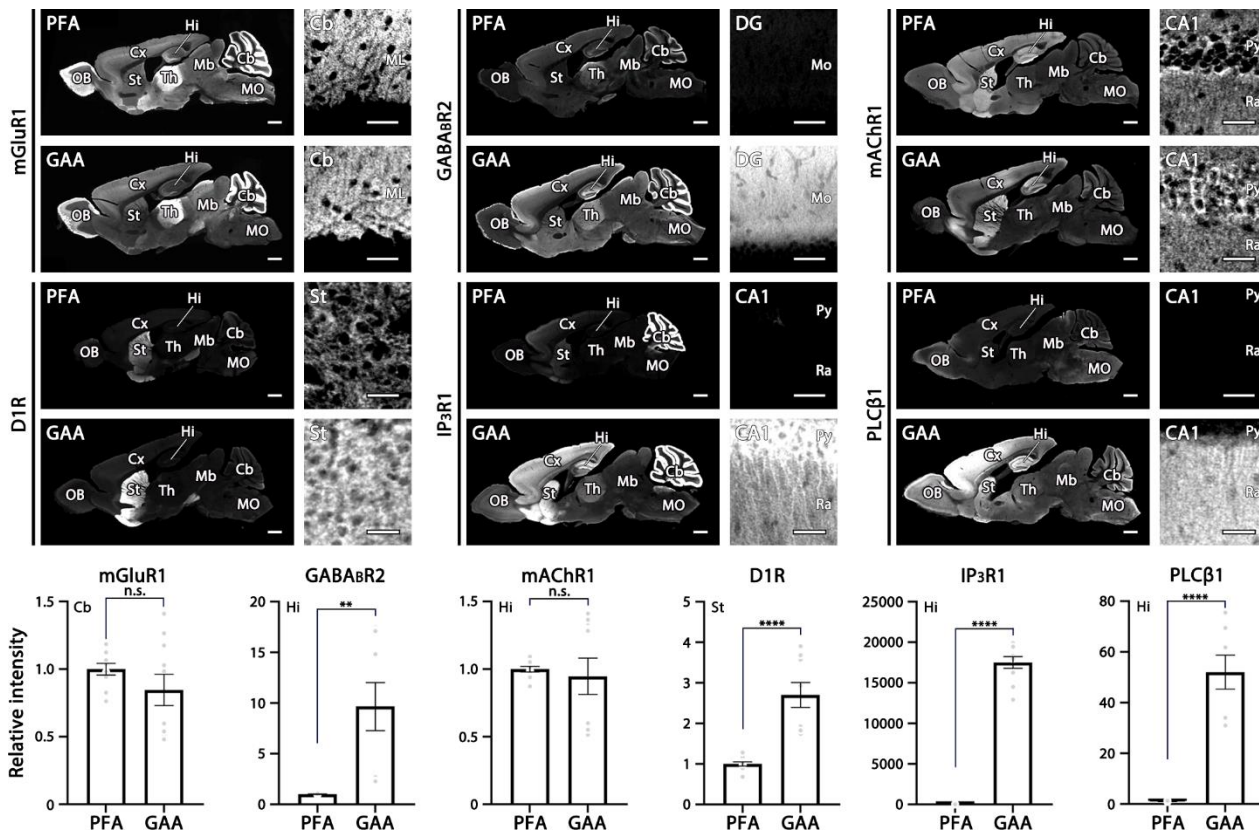

**Fig. S11. Metabotropic receptors and related signaling molecules.** The mean relative intensity is significantly increased by GAA fixation for GABA<sub>B</sub>R2 in the hippocampal dentate gyrus, dopamine receptor D1R in the striatum, inositol triphosphate receptor IP<sub>3</sub>R1 in the hippocampal CA1, and phospholipase PLCβ1 in the hippocampal CA1. No significant differences are noted for metabotropic glutamate receptor mGluR1 in the cerebellum and muscarinic acetylcholine receptor mAChR1 in the hippocampal CA1. Scale bars for high-magnification right panels, 50 μm.



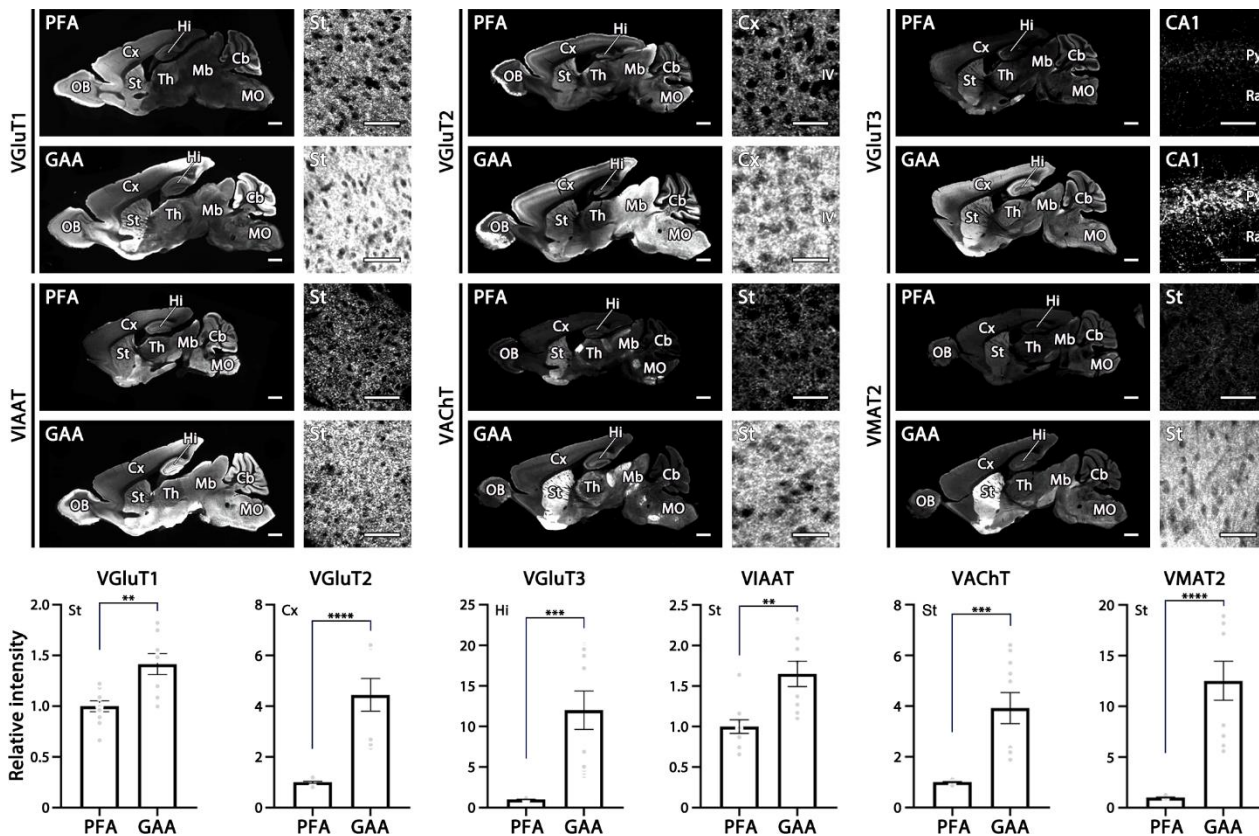

**Fig. S12. Vesicular transporters.** The mean relative intensity is significantly increased by GAA fixation for vesicular glutamate transporter VGluT1 in the striatum, VGluT2 in the somatosensory cortex, VGluT3 in the hippocampal CA1, vesicular inhibitory amino transporter VIAAT in the striatum, vesicular acetylcholine transporter VACHT in the striatum, and vesicular monoamine transporter VMAT2 in the striatum. Scale bars for high-magnification right panels, 50  $\mu$ m.

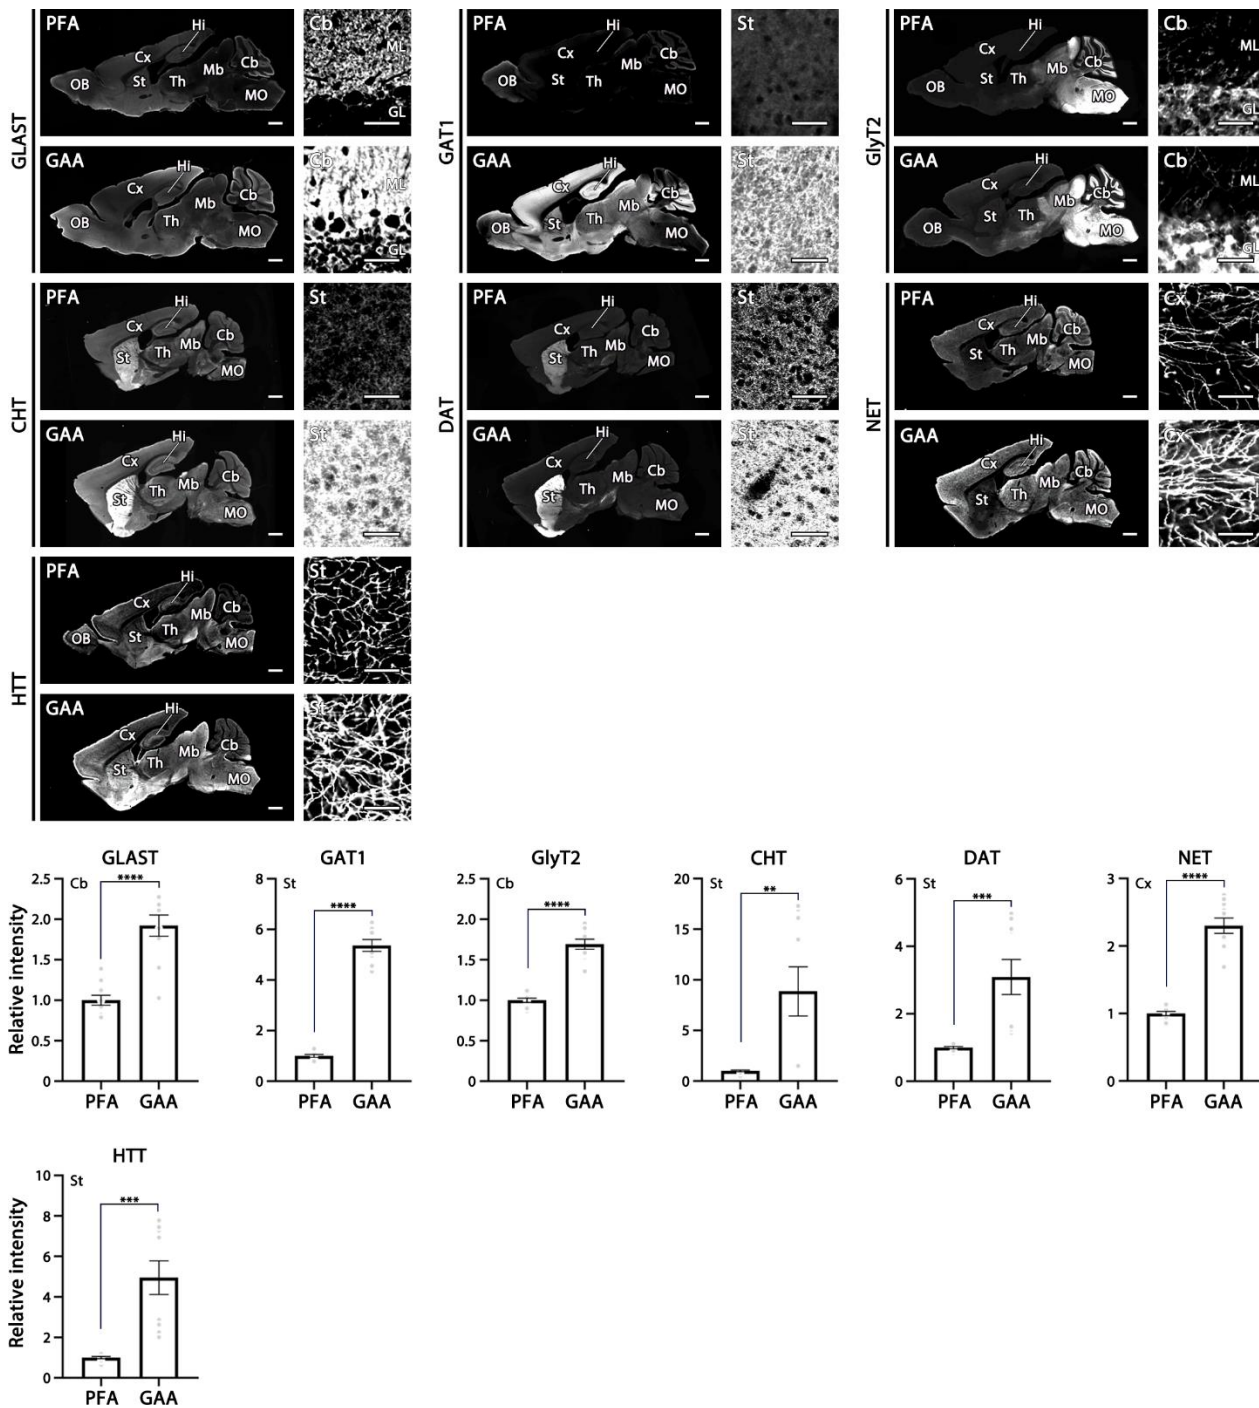

**Fig. S13. Plasmalemmal transporters.** The mean relative intensity is significantly increased by GAA fixation for glutamate-aspartate transporter GLAST in the cerebellum, GABA transporter GAT1 in the striatum, glycine transporter GlyT2 in the cerebellum, choline transporter CHT in the striatum, dopamine transporter DAT in the striatum, noradrenaline transporter NET in the somatosensory cortex, and serotonin transporter HTT in the striatum. Scale bars for high-magnification right panels, 50  $\mu$ m.

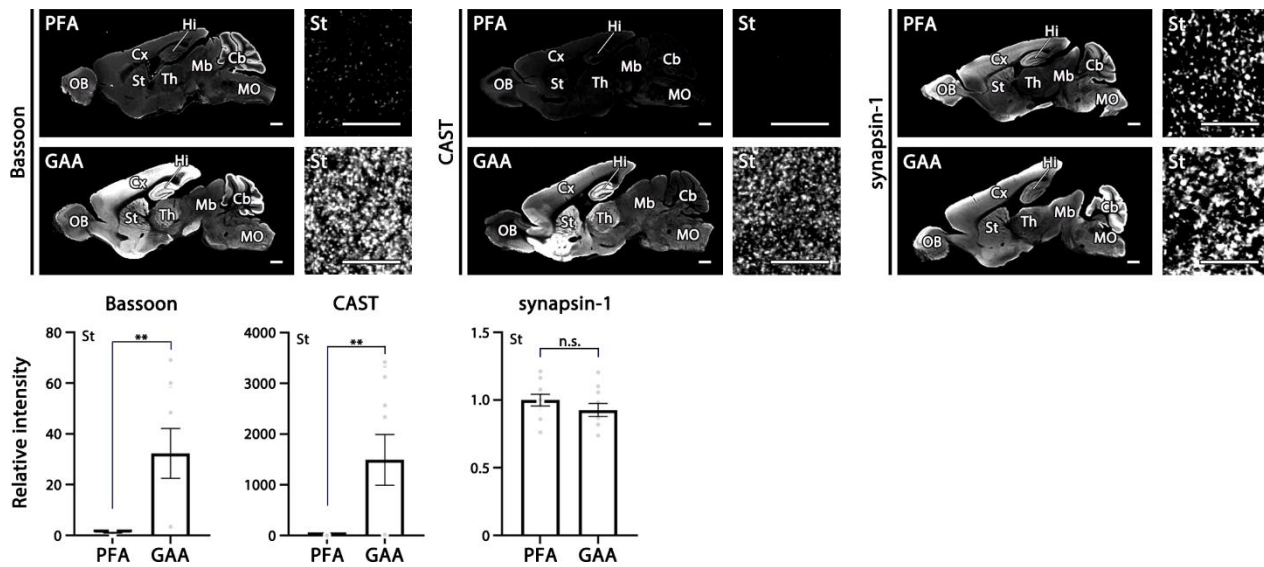

**Fig. S14. Synaptic vesicle-associated or active zone proteins.** The mean relative intensity is significantly increased by GAA fixation for Bassoon and cytomatrix at the active zone-associated structural protein CAST in the striatum. No significant difference is noted for synapsin-1 in the striatum. Scale bars for high-magnification right panels, 10  $\mu$ m.

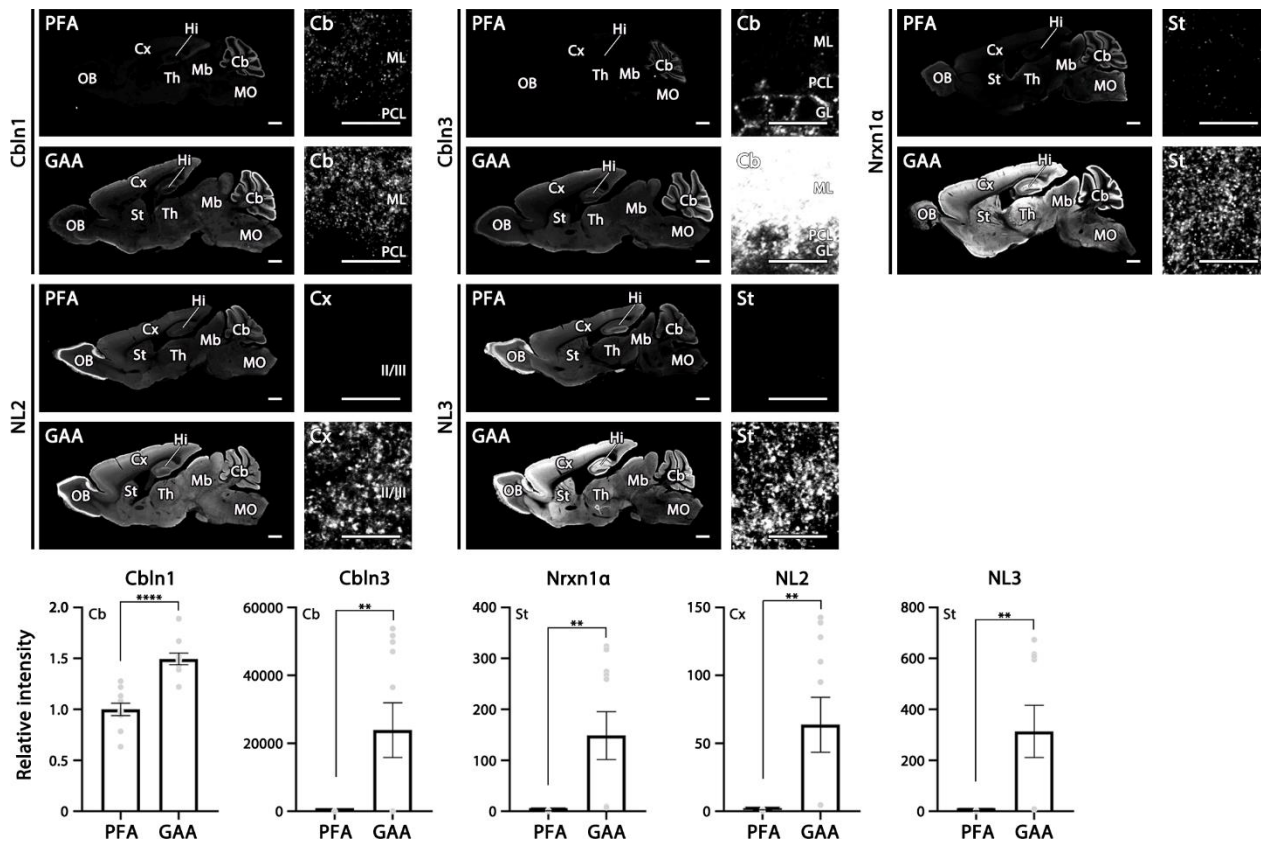

**Fig. S15. Synaptic adhesion molecules.** The mean relative intensity is significantly increased by GAA fixation for Cbln1 or precerebellin, Cbln3 in the cerebellum, neurexin Nrnx1 $\alpha$  in the striatum, Neuroligin (NL)2 in the cortex, and NL3 in the striatum. Scale bars for high-magnification right panels, 10  $\mu$ m.

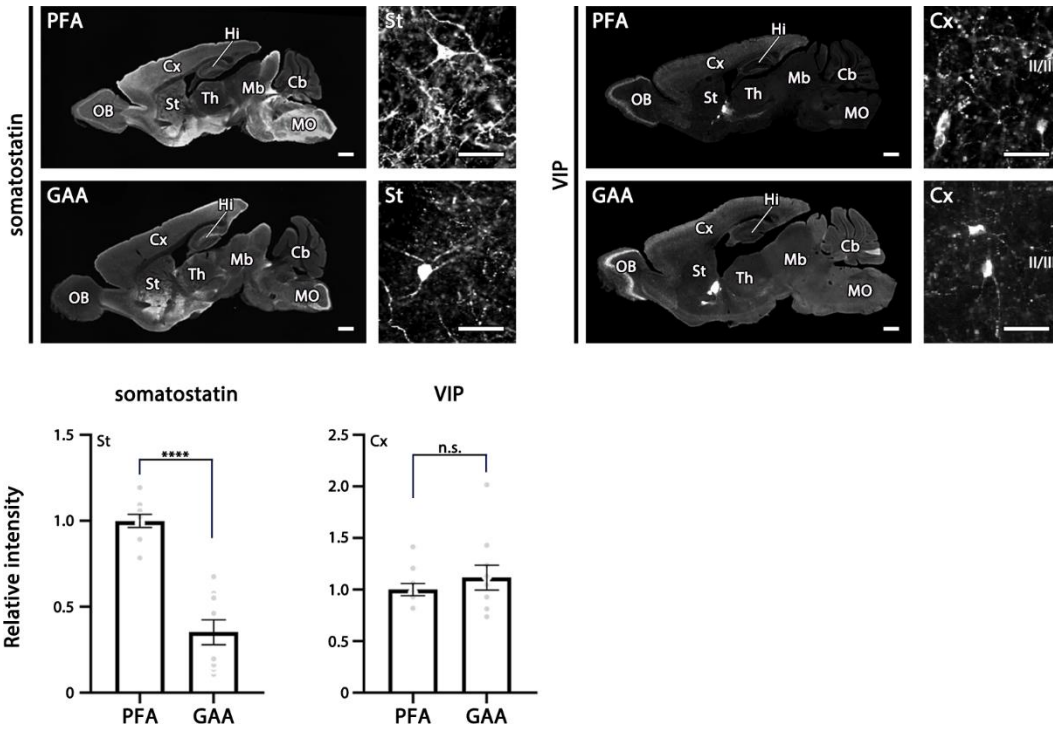

**Fig. S16. Neuropeptides.** The mean relative intensity is significantly decreased by GAA fixation for somatostatin in the striatum. No significant difference is noted for vasoactive intestinal peptide in the somatosensory cortex. Scale bars for high-magnification right panels, 50  $\mu$ m.

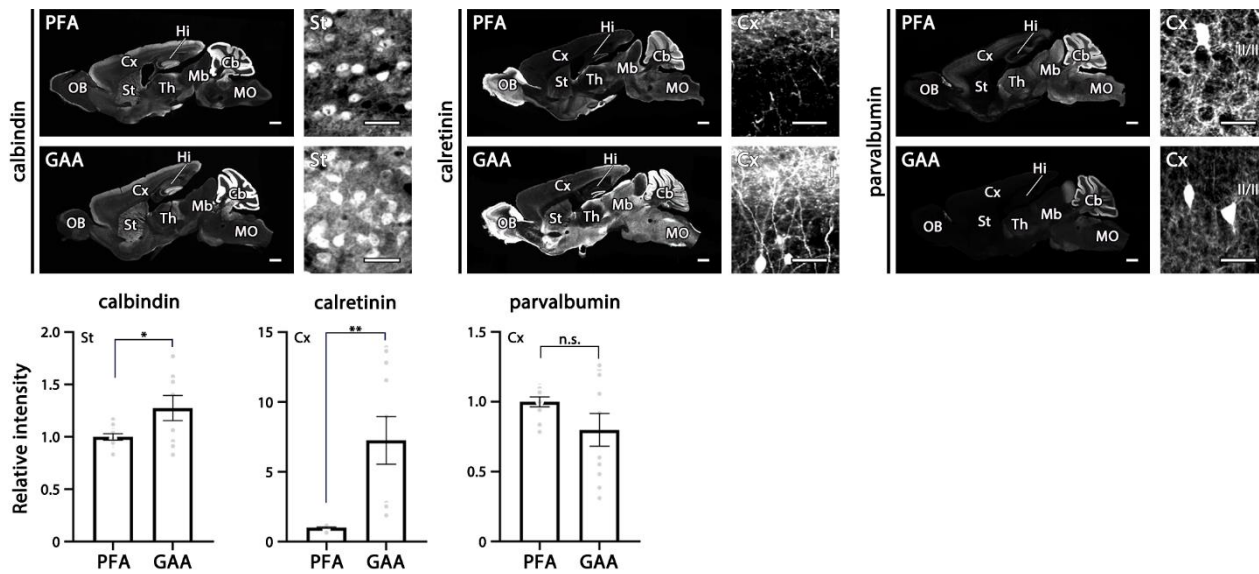

**Fig. S17. Cytosolic calcium-binding proteins.** The mean relative intensity is significantly increased by GAA fixation for calbindin in the striatum and calretinin in the somatosensory cortex, but not for parvalbumin in the somatosensory cortex. Scale bars for high-magnification right panels, 50  $\mu\text{m}$ .

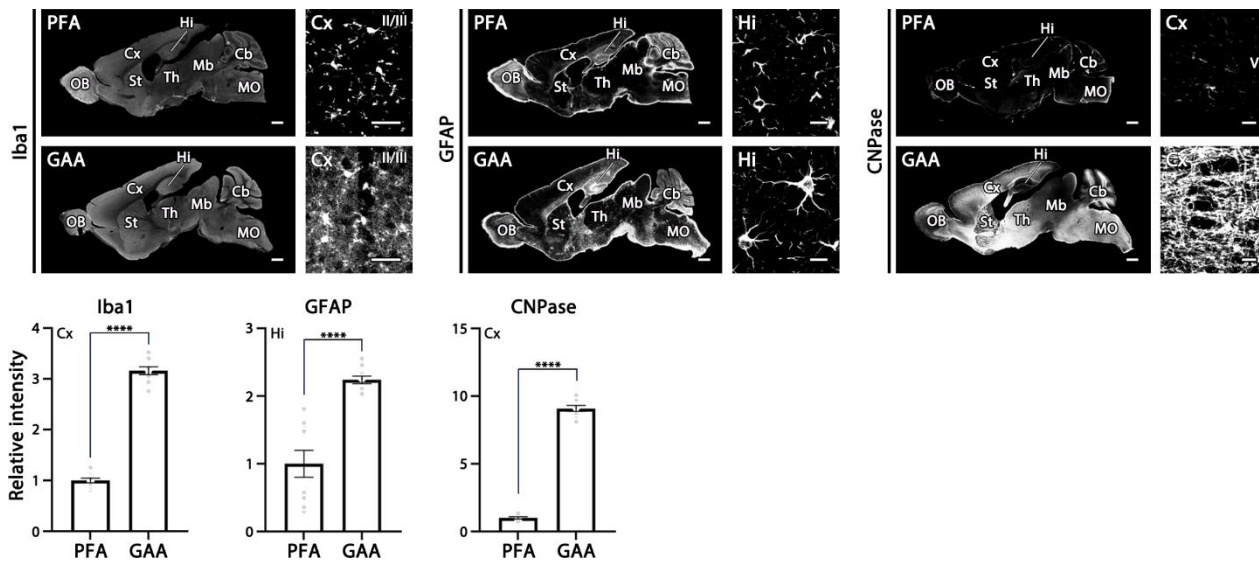

**Fig. S18. Glial marker proteins.** The mean relative intensity is significantly increased by GAA fixation for microglia marker Iba1, astrocyte marker GFAP in the hippocampal CA1, and oligodendrocyte marker CNPase in the somatosensory cortex. Nevertheless, Iba1 immunoreactivity was more clearly observed in PFA-fixed sections, because non-specific staining appeared in GAA-fixed sections in the somatosensory cortex. Thus, we judged no improvement for Iba1 immunostaining by GAA fixation. Scale bars for high-magnification right panels, 10  $\mu$ m.

**Table S1. List of primary antibodies used in the present study.**

| Molecules                         | Sequence (NCBI #)              | Host | RRID        | Specificity                      | Source                                   | Figure                    |
|-----------------------------------|--------------------------------|------|-------------|----------------------------------|------------------------------------------|---------------------------|
| ankyrin-G                         | 1708-1726 aa<br>(NP_733924)    | Rb   | AB_2571661  | IB, SL (axon<br>initial segment) | Iwakura et al. (25)<br>(MSFR100220)      | Figure S10                |
| Bassoon                           |                                | Ms   | AB_11181058 | SL (presynapse)                  | Enzo Life Sciences (VAM-<br>PS003)       | Figure S1, S14            |
| calbindin                         | 1-261 aa<br>(NM009788)         | Go   | AB_2571569  | IB                               | Miura et al. (31)<br>(MSFR100410)        | Figure S17                |
|                                   |                                | Rb   | AB_2571568  | IB                               | Miura et al. (31)<br>(MSFR100390)        | Figure 4, S6, S7          |
| calretinin                        | 1-271 aa<br>(AB037969)         | Rb   | AB_2571666  | IB                               | Miyazaki et al. (32)<br>(MSFR100450)     | Figure S17                |
| CAST                              | 113-161 aa<br>(NM_178085)      | Gp   | AB_2571671  | IB, KO                           | Uchigashima et al. (13)<br>(MSFR100570)  | Figure S14                |
| Ca <sub>v</sub> 2.1               | 421-460 aa<br>(U76716)         | Gp   | AB_2571851  | KO                               | Miyazaki et al. (27)<br>(MSFR106040)     | Figure S9                 |
| Cbln1                             | 38-52aa<br>(NM019626)          | Rb   | AB_2571672  | KO                               | Miura et al. (33)<br>(MSFR100660)        | Figure S15                |
| Cbln3                             | 41-74 aa<br>(NM198114)         | Rb   | AB_2895273  | IB                               | Iijima et al. (34)<br>(MSFR106970)       | Figure S15                |
| CHT                               | 531-580 (BC065089)             | Go   | AB_2571677  | IB                               | Miura et al. (31)<br>(MSFR100870)        | Figure S13                |
| CNPase                            |                                | Ms   |             | SL<br>(oligodendrocyte<br>)      | Sigma (C5922)                            | Figure S18                |
| D1R                               | C-terminus 45 aa<br>(NM010076) | Go   | AB_2571594  | IB                               | Narushima et al. (35)<br>(MSFR101020)    | Figure S11                |
| DAT                               | 1-60 (BC054119)                | Gp   | AB_2571689  | IB                               | Uchigashima, et al. (36)<br>(MSFR101260) | Figure S13                |
| GABA <sub>A</sub><br>R $\alpha$ 1 | 369-386<br>(NM_010250)         | Rb   | AB_2571572  | IB                               | Ichikawa et al. (37)<br>(MSFR101530)     | Figure 1, 7               |
| GABA <sub>A</sub><br>R $\gamma$ 2 |                                | Rb   | AB_2263066  | KD                               | Synaptic Systems<br>(224003)             | Figure 6, 7               |
| GABA <sub>B</sub> R2              | 858-890aa<br>(NM_001081141)    | Gp   | AB_2895275  | KD                               | present study                            | Figure S11                |
| GAT1                              | 564-599aa<br>(NM_178703)       | Rb   | AB_2571703  | IB                               | Iwakura et al. (25)<br>(MSFR101710)      | Figure S13                |
| gephyrin                          |                                | Ms   | AB_2232546  | SL (inhibitory<br>synapse)       | Synaptic Systems<br>(147021)             | Figure 1, S10             |
| GFAP                              | 335-400 aa<br>(AF332061)       | Rb   | AB_2571707  | IB, SL<br>(astrocyte)            | Hisano et al. (38)<br>(MSFR101830)       | Figure S18                |
| GLAST                             | C-terminal 41aa<br>(NM148938)  | Rb   | AB_2571715  | IB, SL<br>(astrocyte)            | Shibata et al. (39)<br>(MSFR102130)      | Figure S13                |
| GluD1                             | 895-932 aa<br>(NM_008166)      | Gp   | AB_2571759  | IB, KO (Fig. 8)                  | Konno et al. (15)<br>(MSFR102510)        | Figure 7, 8               |
| GluD2                             | 897-934 aa<br>(D13266)         | Rb   | AB_2571601  | KO (Fig. 8)                      | Nakamoto et al. (16)<br>(MSFR102570)     | Figure 5, 7, 8,<br>S5, S8 |
| GluA1-4<br>(pan-<br>AMPA)         | 717-754 aa<br>(X57497)         | Gp   | AB_2571610  | IB                               | Fukaya et al. (40)<br>(MSFR104670)       | Figure 2, 4, S6,<br>S7    |
| GluA2                             | 847-863 aa<br>(X57498)         | Rb   | AB_2571754  | IB, KO                           | Fukaya et al. (40)<br>(MSFR102330)       | Figure 1, 7               |
| GluA3                             | 853-883 aa<br>(AB022342)       | Rb   | AB_2571598  | IB, KO                           | Nagy et al. (41)<br>(MSFR102360)         | Figure 7                  |
| GluK2                             | 834-864 aa<br>(D10054)         | Rb   | AB_2904156  | KO lacking the<br>C-terminus     | Yan et al. (42)                          | Figure 7                  |



|                                                   |                                    |    |            |                                   |                                         |                           |
|---------------------------------------------------|------------------------------------|----|------------|-----------------------------------|-----------------------------------------|---------------------------|
| GluN1                                             | 909-938 aa<br>(NM_008169)          | Rb | AB_2571604 | IB, KO (Fig. S4)                  | Abe et al. (19)<br>(MSFR102660)         | Figure 3, S4              |
| GluN2B                                            | 1301-1456 aa<br>(D10651)           | Rb | AB_2571762 | IB                                | Watanabe et al. (5)<br>(MSFR102790)     | Figure 7                  |
| GluN2C                                            | 908-927 aa<br>(D10694)             | Rb | AB_2571763 | IB                                | Yamada et al. (21)<br>(MSFR102810)      | Figure 1, 7               |
| GlyT2                                             | 1-30aa (AF411042)                  | Rb | AB_2571606 | IB, SL<br>(glycinergic<br>neuron) | Hondo et al. (43)<br>(MSFR103070)       | Figure S13                |
| Homer-1                                           | 1-175 aa<br>(NM_147176)            | Rb | AB_2571774 | IB                                | Nakamura et al. (44)<br>(MSFR103210)    | Figure S10                |
| HTT                                               | 1-77 aa (AF013604)                 | Gp | AB_2571777 | IB                                | Somogyi et al. (45)<br>(MSFR103300)     | Figure S13                |
| Iba1                                              |                                    | Rb | AB_839504  | SL (microglia)                    | FUJIFILM Wako (019-<br>19741)           | Figure S18                |
| IP <sub>3</sub> R1                                | 2681-2749<br>(NM010585)            | Rb | AB_2571778 | IB                                | Nakamura et al. (44)<br>(MSFR103400)    | Figure S11                |
| K <sub>v</sub> 1.1                                | 478-492 aa<br>(NM_010595)          | Rb | AB_2571787 | IB                                | Iwakura et al. (25)<br>(MSFR103610)     | Figure S9                 |
| mAChR1                                            | 229-358 aa<br>(NM007698)           | Rb | AB_2571791 | IB                                | Narushima et al. (46)<br>(MSFR103750)   | Figure S11                |
| mGluR1                                            | 945-1127 aa<br>(NM_016976)         | Rb | AB_2571799 | IB                                | Tanaka et al. (47)<br>(MSFR104040)      | Figure S11                |
| NET                                               | 1-56 aa<br>(NM_009209)             | Go | AB_2571809 | IB                                | Uchigashima et al. (36)<br>(MSFR104360) | Figure S13                |
| Na <sub>v</sub> 1.1-1.9<br>(pan-Na <sub>v</sub> ) | 1492-1508 aa<br>(NM_018733)        | Rb | AB_2571818 | IB                                | Iwakura et al. (25)<br>(MSFR104700)     | Figure S9                 |
| NL1                                               | 805-826 aa<br>(NM_138666)          | Go | AB_2895276 | KO (Fig. 6)                       | present study                           | Figure 6                  |
| NL2                                               | 784-829 aa<br>(NM_198862)          | Gp | AB_2571609 | IB, KO (Fig. 8)                   | Iwakura et al. (25)<br>(MSFR104480)     | Figure 8, S15             |
| NL3                                               | 739-768 aa<br>(NM_172932)          | Gp | AB_2571814 | IB, KO (Fig. 8)                   | Uchigashima et al. (13)<br>(MSFR104540) | Figure 8, S15             |
| Nrxn1 $\alpha$                                    | 1454-1507 aa<br>(NM_020252)        | Rb | AB_2571817 | IB                                | Uchigashima et al. (13)<br>(MSFR104640) | Figure S15                |
| paralbumin                                        | whole sequence<br>(NM013645)       | Gp | AB_2571615 | IB                                | Nakamura et al. (44)<br>(MSFR105260)    | Figure S4, S17            |
| PLC $\beta$ 1                                     | 36-87 aa<br>(NM_019677)            | Gp | AB_2571828 | IB, KO                            | Fukaya et al. (48)<br>(MSFR104930)      | Figure S11                |
| somatostatin                                      | 35-88aa (BC010770)                 | Rb | AB_2895277 | ISH                               | present study                           | Figure S16                |
| PSD-95                                            | 1-64 (D50621)                      | Gp | AB_2571612 | IB, KO (Fig. 8)                   | Fukaya & Watanabe (8)<br>(MSFR105190)   | Figure 1, 6, 8,<br>S2, S3 |
|                                                   |                                    | Go | AB_2920798 | IB                                | Fukaya & Watanabe (8)<br>(MSFR107520)   | Figure S4                 |
| SAP-102                                           | 1-146 aa (D87117)                  | Rb | AB_2571832 | IB                                | Fukaya & Watanabe (8)<br>(MSFR105070)   | Figure S3                 |
| Shank2                                            | C-terminal 13 aa<br>(NM_001081370) | Rb | AB_2571839 | IB                                | Matsuda et al. (49)<br>(MSFR105500)     | Figure S10                |
| synapsin-1                                        | 686-706aa<br>(NM_013680)           | Rb | AB_2636934 | IB                                | present study                           | Figure S14                |
| TARP- $\gamma$ 2                                  | 302-318 aa<br>(AF077739)           | Gp | AB_2895281 | KO                                | Yamazaki et al. (26)<br>(MSFR105780)    | Figure S10                |
| TARP- $\gamma$ 8                                  | 362-421aa<br>(AF361350)            | Rb | AB_2571846 | KO                                | Fukaya et al. (40)<br>(MSFR105830)      | Figure S10                |
| VACHT                                             | 518-530 aa<br>(AF019045)           | Rb | AB_2736903 | IB                                | Nakamura et al. (44)<br>(MSFR106490)    | Figure S12                |

|        |                           |    |            |     |                                      |                         |
|--------|---------------------------|----|------------|-----|--------------------------------------|-------------------------|
| VGlut1 | 531–560 aa<br>(BC054462)  | Go | AB_2571617 | IB  | Miyazaki et al. (12)<br>(MSFR106210) | Figure 1, 5, S1,<br>S12 |
| VGlut2 | 559–582 aa<br>(BC038375)  | Gp | AB_2571621 | IB  | Miyazaki et al. (12)<br>(MSFR107440) | Figure 2, 5, S1,<br>S12 |
|        |                           | Go | AB_2571620 | IB  | Kawamura et al. (50)<br>(MSFR106270) | Figure 4, S6, S7        |
| VGlut3 | 558–602 aa<br>(AF510321)  | Go | AB_2571854 | IB  | Somogyi et al. (45)<br>(MSFR106340)  | Figure S12              |
| VIAAT  | 31–112 (BC052020)         | Rb | AB_2571622 | IB  | Miura et al. (31)<br>(MSFR106120)    | Figure S1, S12          |
| VIP    | 58-72aa<br>(XM_006512446) | Gp | AB_2895283 | ISH | present study                        | Figure S16              |
| VMAT2  | 468-515 aa<br>(L00603)    | Rb | AB_2571857 | IB  | Somogyi et al. (45)<br>(MSFR106410)  | Figure S12              |

**Table S2. Detailed data and statistics.**

| Figures                         |        |                                                        |                                                                  |                 |                                 |                |                       |              |                           |
|---------------------------------|--------|--------------------------------------------------------|------------------------------------------------------------------|-----------------|---------------------------------|----------------|-----------------------|--------------|---------------------------|
|                                 |        | Number of measured areas                               | Mean ± SEM                                                       | Statistics      | Result                          | Post-hoc Test  | Comparison            | Significance | P-value                   |
| Fig.1A<br>GluA2                 | PFA    | 10                                                     | 1.00 ± 0.22                                                      | One-way ANOVA   | F (4, 45) = 5.405               | Dunnett's test | PFA, G, GAA, GE, GAAE | **           | P = 0.0012                |
|                                 | G      | 10                                                     | 118.21 ± 32.42                                                   |                 |                                 |                | PFA G                 | **           | P = 0.0038                |
|                                 | GAA    | 10                                                     | 127.23 ± 35.28                                                   |                 |                                 |                | PFA GAA               | **           | P = 0.0017                |
|                                 | GE     | 10                                                     | 29.42 ± 9.07                                                     |                 |                                 |                | PFA GE                | n.s.         | P = 0.8089                |
|                                 | GAAE   | 10                                                     | 73.67 ± 20.09                                                    |                 |                                 |                | PFA GAAE              | n.s.         | P = 0.1097                |
| Fig.1A<br>GABA <sub>A</sub> Rα1 | PFA    | 10                                                     | 1.00 ± 0.04                                                      | One-way ANOVA   | F (4, 45) = 13.94               | Dunnett's test | PFA, G, GAA, GE, GAAE | ****         | P <sub>adj</sub> < 0.0001 |
|                                 | G      | 10                                                     | 6.05 ± 1.11                                                      |                 |                                 |                | PFA G                 | ***          | P = 0.0002                |
|                                 | GAA    | 10                                                     | 6.96 ± 1.36                                                      |                 |                                 |                | PFA GAA               | ****         | P <sub>adj</sub> < 0.0001 |
|                                 | GE     | 10                                                     | 0.56 ± 0.15                                                      |                 |                                 |                | PFA GE                | n.s.         | P = 0.9841                |
|                                 | GAAE   | 10                                                     | 2.27 ± 0.12                                                      |                 |                                 |                | PFA GAAE              | n.s.         | P = 0.6192                |
| Fig.1A<br>PSD-95                | PFA    | 10                                                     | 1.00 ± 0.07                                                      | One-way ANOVA   | F (4, 45) = 56.63               | Dunnett's test | PFA, G, GAA, GE, GAAE | ****         | P <sub>adj</sub> < 0.0001 |
|                                 | G      | 10                                                     | 4.15 ± 0.31                                                      |                 |                                 |                | PFA G                 | ****         | P <sub>adj</sub> < 0.0001 |
|                                 | GAA    | 10                                                     | 6.35 ± 0.73                                                      |                 |                                 |                | PFA GAA               | ****         | P <sub>adj</sub> < 0.0001 |
|                                 | GE     | 10                                                     | 0.25 ± 0.03                                                      |                 |                                 |                | PFA GE                | n.s.         | P = 0.3855                |
|                                 | GAAE   | 10                                                     | 0.48 ± 0.03                                                      |                 |                                 |                | PFA GAAE              | n.s.         | P = 0.6991                |
| Fig.1A<br>gephyrin              | PFA    | 10                                                     | 1.00 ± 0.14                                                      | One-way ANOVA   | F (4, 45) = 13.44               | Dunnett's test | PFA, G, GAA, GE, GAAE | ****         | P <sub>adj</sub> < 0.0001 |
|                                 | G      | 10                                                     | 10.83 ± 1.84                                                     |                 |                                 |                | PFA G                 | ****         | P <sub>adj</sub> < 0.0001 |
|                                 | GAA    | 10                                                     | 14.30 ± 1.38                                                     |                 |                                 |                | PFA GAA               | ****         | P <sub>adj</sub> < 0.0001 |
|                                 | GE     | 10                                                     | 9.63 ± 1.51                                                      |                 |                                 |                | PFA GE                | ***          | P = 0.0002                |
|                                 | GAAE   | 10                                                     | 9.48 ± 1.15                                                      |                 |                                 |                | PFA GAAE              | ***          | P = 0.0002                |
| Fig.1C                          |        | PFA_PBS (6), PFA_PBS-T (6), GAA_PBS (6), GAA_PBS-T (6) | PFA_PBS-T/PFA_PBS (1.54 ± 0.10), GAA_PBS-T/GAA_PBS (4.27 ± 0.14) | Unpaired t-test | t = 15.99, df = 10 (Two-tailed) |                | PFA GAA               | ****         | P <sub>adj</sub> < 0.0001 |
| Fig.2                           | VGluT2 | PFA (10), GAA (10)                                     | PFA (1.00 ± 0.13), GAA (11.35 ± 1.01)                            | Unpaired t-test | t = 10.13, df = 18 (Two-tailed) |                | PFA GAA               | ****         | P <sub>adj</sub> < 0.0001 |

|         |        |                                      |                                           |                 |                                  |                                                   |                |                    |      |                    |
|---------|--------|--------------------------------------|-------------------------------------------|-----------------|----------------------------------|---------------------------------------------------|----------------|--------------------|------|--------------------|
|         | AMPAR  | PFA (10), GAA (10)                   | PFA (1.00 ± 0.37), GAA (9199.67 ± 460.57) | Unpaired t-test | t = 19.97, df = 18 (Two-tailed)  | PFA<br>GAA                                        | ****           | $P_{adj} < 0.0001$ |      |                    |
| Fig. 3G | CA1 Or | PFA (6), GAA (6)                     | PFA (1.00 ± 0.06), GAA (8.73 ± 0.64)      | Unpaired t-test | t = 12.03, df = 10 (Two-tailed)  | PFA<br>GAA                                        | ****           | $P_{adj} < 0.0001$ |      |                    |
|         | CA1 Ra | PFA (6), GAA (6)                     | PFA (1.00 ± 0.04), GAA (10.03 ± 0.53)     | Unpaired t-test | t = 16.98, df = 10 (Two-tailed)  | PFA<br>GAA                                        | ****           | $P_{adj} < 0.0001$ |      |                    |
| Fig. 3J |        | PFA (66 synapses), GAA (62 synapses) | PFA (0.00 ± 0.00), GAA (5.54 ± 0.45)      | Unpaired t-test | t = 12.68, df = 126 (Two-tailed) | PFA<br>GAA                                        | ****           | $P_{adj} < 0.0001$ |      |                    |
| Fig. 4I | 0 μm   | 6                                    | 1.00 ± 0.03                               | One-way ANOVA   | F (9, 50) = 283.6                | 0, 0.2, 0.4, 0.6, 0.8, 1.0, 1.2, 1.4, 1.6, 1.8 μm | ****           | $P_{adj} < 0.0001$ |      |                    |
|         | 0.2 μm | 6                                    | 0.89 ± 0.04                               |                 |                                  |                                                   | Dunnett's test | 0 μm<br>0.2 μm     | *    | $P = 0.0159$       |
|         | 0.4 μm | 6                                    | 0.69 ± 0.04                               |                 |                                  |                                                   |                | 0 μm<br>0.4 μm     | **** | $P_{adj} < 0.0001$ |
|         | 0.6 μm | 6                                    | 0.45 ± 0.03                               |                 |                                  |                                                   |                | 0 μm<br>0.6 μm     | **** | $P_{adj} < 0.0001$ |
|         | 0.8 μm | 6                                    | 0.25 ± 0.01                               |                 |                                  |                                                   |                | 0 μm<br>0.8 μm     | **** | $P_{adj} < 0.0001$ |
|         | 1.0 μm | 6                                    | 0.10 ± 0.01                               |                 |                                  |                                                   |                | 0 μm<br>1.0 μm     | **** | $P_{adj} < 0.0001$ |
|         | 1.2 μm | 6                                    | 0.04 ± 0.01                               |                 |                                  |                                                   |                | 0 μm<br>1.2 μm     | **** | $P_{adj} < 0.0001$ |
|         | 1.4 μm | 6                                    | 0.02 ± 0.01                               |                 |                                  |                                                   |                | 0 μm<br>1.4 μm     | **** | $P_{adj} < 0.0001$ |
|         | 1.6 μm | 6                                    | 0.00 ± 0.00                               |                 |                                  |                                                   |                | 0 μm<br>1.6 μm     | **** | $P_{adj} < 0.0001$ |
|         | 1.8 μm | 6                                    | 0.00 ± 0.00                               |                 |                                  |                                                   |                | 0 μm<br>1.8 μm     | **** | $P_{adj} < 0.0001$ |
| Fig. 4J | 0 μm   | 6                                    | 1.00 ± 0.04                               | One-way ANOVA   | F (9, 50) = 0.352                | 0, 0.2, 0.4, 0.6, 0.8, 1.0, 1.2, 1.4, 1.6, 1.8 μm | n.s.           | $P = 0.9520$       |      |                    |
|         | 0.2 μm | 6                                    | 0.97 ± 0.06                               |                 |                                  |                                                   |                |                    |      |                    |
|         | 0.4 μm | 6                                    | 1.04 ± 0.06                               |                 |                                  |                                                   |                |                    |      |                    |
|         | 0.6 μm | 6                                    | 1.00 ± 0.05                               |                 |                                  |                                                   |                |                    |      |                    |
|         | 0.8 μm | 6                                    | 1.07 ± 0.05                               |                 |                                  |                                                   |                |                    |      |                    |
|         | 1.0 μm | 6                                    | 1.06 ± 0.06                               |                 |                                  |                                                   |                |                    |      |                    |
|         | 1.2 μm | 6                                    | 1.05 ± 0.05                               |                 |                                  |                                                   |                |                    |      |                    |
|         | 1.4 μm | 6                                    | 1.02 ± 0.05                               |                 |                                  |                                                   |                |                    |      |                    |
|         | 1.6 μm | 6                                    | 0.98 ± 0.06                               |                 |                                  |                                                   |                |                    |      |                    |
|         | 1.8 μm | 6                                    | 0.98 ± 0.07                               |                 |                                  |                                                   |                |                    |      |                    |

|                     |                   |                                          |                                                   |                 |                                  |                                |               |                    |                    |
|---------------------|-------------------|------------------------------------------|---------------------------------------------------|-----------------|----------------------------------|--------------------------------|---------------|--------------------|--------------------|
| Fig. 4K<br>PFA      | 0 $\mu\text{m}$   | AMPA(+)/VGluT2(+)/Total VGluT2(+): 61/64 | Apposition rate: 95.31%                           |                 |                                  |                                |               |                    |                    |
|                     | 0.2 $\mu\text{m}$ | 98/104                                   | 94.23%                                            |                 |                                  |                                |               |                    |                    |
|                     | 0.4 $\mu\text{m}$ | 108/127                                  | 85.04%                                            |                 |                                  |                                |               |                    |                    |
|                     | 0.6 $\mu\text{m}$ | 93/143                                   | 65.03%                                            |                 |                                  |                                |               |                    |                    |
|                     | 0.8 $\mu\text{m}$ | 76/159                                   | 47.79%                                            |                 |                                  |                                |               |                    |                    |
|                     | 1.0 $\mu\text{m}$ | 33/163                                   | 20.25%                                            |                 |                                  |                                |               |                    |                    |
|                     | 1.2 $\mu\text{m}$ | 9/166                                    | 5.42%                                             |                 |                                  |                                |               |                    |                    |
|                     | 1.4 $\mu\text{m}$ | 3/172                                    | 1.74%                                             |                 |                                  |                                |               |                    |                    |
|                     | 1.6 $\mu\text{m}$ | 3/159                                    | 1.89%                                             |                 |                                  |                                |               |                    |                    |
|                     | 1.8 $\mu\text{m}$ | 3/150                                    | 2.00%                                             |                 |                                  |                                |               |                    |                    |
| Fig. 4K<br>GAA      | 0 $\mu\text{m}$   | 80/82                                    | 97.56%                                            |                 |                                  |                                |               |                    |                    |
|                     | 0.2 $\mu\text{m}$ | 105/108                                  | 97.22%                                            |                 |                                  |                                |               |                    |                    |
|                     | 0.4 $\mu\text{m}$ | 122/130                                  | 93.85%                                            |                 |                                  |                                |               |                    |                    |
|                     | 0.6 $\mu\text{m}$ | 138/144                                  | 95.83%                                            |                 |                                  |                                |               |                    |                    |
|                     | 0.8 $\mu\text{m}$ | 153/161                                  | 95.03%                                            |                 |                                  |                                |               |                    |                    |
|                     | 1.0 $\mu\text{m}$ | 153/162                                  | 94.44%                                            |                 |                                  |                                |               |                    |                    |
|                     | 1.2 $\mu\text{m}$ | 157/169                                  | 92.90%                                            |                 |                                  |                                |               |                    |                    |
|                     | 1.4 $\mu\text{m}$ | 160/177                                  | 90.40%                                            |                 |                                  |                                |               |                    |                    |
|                     | 1.6 $\mu\text{m}$ | 153/176                                  | 86.93%                                            |                 |                                  |                                |               |                    |                    |
|                     | 1.8 $\mu\text{m}$ | 135/167                                  | 80.84%                                            |                 |                                  |                                |               |                    |                    |
| Fig. 5E             |                   | PFA (159 synapses), GAA (32 synapses)    | PFA ( $9.64 \pm 0.53$ ), GAA ( $19.81 \pm 1.92$ ) | Unpaired t-test | t = 6.955, df = 189 (Two-tailed) | PFA GAA                        | ****          | $P_{adj} < 0.0001$ |                    |
| Fig. 6G<br>CA1 (Ra) | PFA WT            | 10                                       | $1.00 \pm 0.03$                                   | One-way ANOVA   | F (3, 36) = 1683                 | PFA-WT, PFA-KO, GAA-WT, GAA-KO | ****          | $P_{adj} < 0.0001$ |                    |
|                     | PFA KO            | 10                                       | $0.01 \pm 0.00$                                   |                 |                                  | Tukey's test                   | PFA-WT PFA-KO | ****               | $P_{adj} < 0.0001$ |
|                     | GAA WT            | 10                                       | $4.24 \pm 0.07$                                   |                 |                                  | GAA-WT GAA-KO                  | ****          | $P_{adj} < 0.0001$ |                    |

|                     |        |                                                               |                                                       |                 |                                  |                                         |      |                    |
|---------------------|--------|---------------------------------------------------------------|-------------------------------------------------------|-----------------|----------------------------------|-----------------------------------------|------|--------------------|
|                     | GAA KO | 10                                                            | 0.28 ± 0.05                                           |                 |                                  | PFA-WT<br>GAA-WT                        | **** | $P_{adj} < 0.0001$ |
| Fig. 6G<br>CA1 (LM) | PFA WT | 10                                                            | 1.00 ± 0.04                                           | One-way ANOVA   | F (3, 36) = 980.3                | PFA-WT,<br>PFA-KO,<br>GAA-WT,<br>GAA-KO | **** | $P_{adj} < 0.0001$ |
|                     | PFA KO | 10                                                            | 0.02 ± 0.00                                           |                 |                                  | PFA-WT<br>PFA-KO                        | **** | $P_{adj} < 0.0001$ |
|                     | GAA WT | 10                                                            | 4.47 ± 0.11                                           |                 |                                  | GAA-WT<br>GAA-KO                        | **** | $P_{adj} < 0.0001$ |
|                     | GAA KO | 10                                                            | 0.18 ± 0.06                                           |                 |                                  | PFA-WT<br>GAA-WT                        | **** | $P_{adj} < 0.0001$ |
| Fig. 6G<br>Cx       | PFA WT | 10                                                            | 1.00 ± 0.02                                           | One-way ANOVA   | F (3, 36) = 707.8                | PFA-WT,<br>PFA-KO,<br>GAA-WT,<br>GAA-KO | **** | $P_{adj} < 0.0001$ |
|                     | PFA KO | 10                                                            | 0.08 ± 0.01                                           |                 |                                  | PFA-WT<br>PFA-KO                        | **** | $P_{adj} < 0.0001$ |
|                     | GAA WT | 10                                                            | 2.35 ± 0.07                                           |                 |                                  | GAA-WT<br>GAA-KO                        | **** | $P_{adj} < 0.0001$ |
|                     | GAA KO | 10                                                            | 0.08 ± 0.03                                           |                 |                                  | PFA-WT<br>GAA-WT                        | **** | $P_{adj} < 0.0001$ |
| Fig. 6G<br>St       | PFA WT | 10                                                            | 1.00 ± 0.06                                           | One-way ANOVA   | F (3, 36) = 177.8                | PFA-WT,<br>PFA-KO,<br>GAA-WT,<br>GAA-KO | **** | $P_{adj} < 0.0001$ |
|                     | PFA KO | 10                                                            | 0.29 ± 0.03                                           |                 |                                  | PFA-WT<br>PFA-KO                        | **** | $P_{adj} < 0.0001$ |
|                     | GAA WT | 10                                                            | 2.28 ± 0.13                                           |                 |                                  | GAA-WT<br>GAA-KO                        | **** | $P_{adj} < 0.0001$ |
|                     | GAA KO | 10                                                            | 0.11 ± 0.02                                           |                 |                                  | PFA-WT<br>GAA-WT                        | **** | $P_{adj} < 0.0001$ |
| Fig. 6L             | CA1 Ra | PSD-95 (12 area, 1567 clusters), GABAAR $\alpha$ 1 (12, 1049) | PSD-95 (1.00 ± 0.01), GABAAR $\alpha$ 1 (0.94 ± 0.02) | Unpaired t-test | t = 1.122, df = 22 (Two-tailed)  | PSD-95<br>GABAAR $\alpha$ 1             | n.s. | $P = 0.2740$       |
| Fig. 6M             | CA1 LM | PSD-95 (12, 1801), GABAAR $\alpha$ 1 (12, 1436)               | PSD-95 (1.00 ± 0.01), GABAAR $\alpha$ 1 (0.63 ± 0.01) | Unpaired t-test | t = 7.734, df = 22 (Two-tailed)  | PSD-95<br>GABAAR $\alpha$ 1             | **** | $P_{adj} < 0.0001$ |
| Fig. 6N             | Cx LI  | PSD-95 (12, 1346), GABAAR $\alpha$ 1 (12, 1186)               | PSD-95 (1.00 ± 0.01), GABAAR $\alpha$ 1 (0.79 ± 0.01) | Unpaired t-test | t = 3.396, df = 22 (Two-tailed)  | PSD-95<br>GABAAR $\alpha$ 1             | **   | $P = 0.0026$       |
| Fig. 6O             | Cx LV  | PSD-95 (12, 1393), GABAAR $\alpha$ 1 (12, 741)                | PSD-95 (1.00 ± 0.01), GABAAR $\alpha$ 1 (0.72 ± 0.01) | Unpaired t-test | t = 4.568, df = 22 (Two-tailed)  | PSD-95<br>GABAAR $\alpha$ 1             | ***  | $P = 0.0002$       |
| Fig. 6S             |        | WT (37 synapses), NL1-KO (69 synapses)                        | WT (3.16 ± 0.22), NL1-KO (0.03 ± 0.03)                | Unpaired t-test | t = 19.20, df = 104 (Two-tailed) | WT<br>NL1-KO                            | **** | $P_{adj} < 0.0001$ |
| Fig. 7              | GluA2  | PFA (10), GAA (10)                                            | PFA (1.00 ± 0.17), GAA (193.22 ± 59.99)               | Unpaired t-test | t = 3.204, df = 18 (Two-tailed)  | PFA<br>GAA                              | **   | $P = 0.0049$       |
|                     | GluA3  | PFA (10), GAA (10)                                            | PFA (1.00 ± 0.14), GAA (8.82 ± 2.26)                  | Unpaired t-test | t = 3.453, df = 18 (Two-tailed)  | PFA<br>GAA                              | **   | $P = 0.0028$       |

|                       |                    |                                           |                 |                                 |            |      |                           |
|-----------------------|--------------------|-------------------------------------------|-----------------|---------------------------------|------------|------|---------------------------|
| GluK2                 | PFA (10), GAA (10) | PFA (1.00 ± 0.21), GAA (1475.42 ± 499.42) | Unpaired t-test | t = 2.952, df = 18 (Two-tailed) | PFA<br>GAA | **   | P = 0.0085                |
| GluN2B                | PFA (10), GAA (10) | PFA (1.00 ± 0.19), GAA (283.73 ± 69.75)   | Unpaired t-test | t = 4.053, df = 18 (Two-tailed) | PFA<br>GAA | ***  | P = 0.0007                |
| GluN2C                | PFA (10), GAA (10) | PFA (1.00 ± 0.14), GAA (75.72 ± 5.11)     | Unpaired t-test | t = 14.63, df = 18 (Two-tailed) | PFA<br>GAA | **** | P <sub>adj</sub> < 0.0001 |
| GluD1                 | PFA (10), GAA (10) | PFA (1.00 ± 0.08), GAA (3.60 ± 0.15)      | Unpaired t-test | t = 15.41, df = 18 (Two-tailed) | PFA<br>GAA | **** | P <sub>adj</sub> < 0.0001 |
| GluD2                 | PFA (10), GAA (10) | PFA (1.00 ± 0.17), GAA (13.00 ± 0.42)     | Unpaired t-test | t = 26.63, df = 18 (Two-tailed) | PFA<br>GAA | **** | P <sub>adj</sub> < 0.0001 |
| GABA <sub>A</sub> Ry1 | PFA (10), GAA (10) | PFA (1.00 ± 0.05), GAA (10.48 ± 2.84)     | Unpaired t-test | t = 3.331, df = 18 (Two-tailed) | PFA<br>GAA | **   | P = 0.0037                |
| GABA <sub>A</sub> Ry2 | PFA (10), GAA (10) | PFA (1.00 ± 0.28), GAA (709.20 ± 227.75)  | Unpaired t-test | t = 3.110, df = 18 (Two-tailed) | PFA<br>GAA | **   | P = 0.0061                |

Supplementary Figures

|                    |      |    |              |                |                   |                       |                   |                           |
|--------------------|------|----|--------------|----------------|-------------------|-----------------------|-------------------|---------------------------|
| Fig.S1A<br>Bassoon | PFA  | 10 | 1.00 ± 0.05  | One-way ANOVA  | F (4, 45) = 15.92 | PFA, G, GAA, GE, GAEE | ****              | P <sub>adj</sub> < 0.0001 |
|                    | G    | 10 | 3.71 ± 0.58  | Dunnett's test |                   | PFA G                 | ****              | P <sub>adj</sub> < 0.0001 |
|                    | GAA  | 10 | 4.52 ± 0.41  |                |                   | PFA GAA               | ****              | P <sub>adj</sub> < 0.0001 |
|                    | GE   | 10 | 2.69 ± 0.06  |                |                   | PFA GE                | **                | P = 0.0027                |
|                    | GAEE | 10 | 3.08 ± 0.19  |                |                   | PFA GAEE              | ***               | P = 0.0002                |
| Fig.S1A<br>VGluT1  | PFA  | 10 | 1.00 ± 0.05  |                |                   | One-way ANOVA         | F (4, 45) = 31.68 | PFA, G, GAA, GE, GAEE     |
|                    | G    | 10 | 3.79 ± 0.10  | Dunnett's test |                   | PFA G                 | ****              | P <sub>adj</sub> < 0.0001 |
|                    | GAA  | 10 | 3.28 ± 0.16  |                |                   | PFA GAA               | ****              | P <sub>adj</sub> < 0.0001 |
|                    | GE   | 10 | 3.08 ± 0.35  |                |                   | PFA GE                | ****              | P <sub>adj</sub> < 0.0001 |
|                    | GAEE | 10 | 3.15 ± 0.13  |                |                   | PFA GAEE              | ****              | P <sub>adj</sub> < 0.0001 |
| Fig.S1A<br>VGluT2  | PFA  | 10 | 1.00 ± 0.08  |                |                   | One-way ANOVA         | F (4, 45) = 5.237 | PFA, G, GAA, GE, GAEE     |
|                    | G    | 10 | 18.18 ± 4.76 | Dunnett's test |                   | PFA G                 | ***               | P = 0.0009                |
|                    | GAA  | 10 | 15.84 ± 4.17 |                |                   | PFA GAA               | **                | P = 0.0044                |
|                    | GE   | 10 | 7.78 ± 1.85  |                |                   | PFA GE                | n.s.              | P = 0.3340                |
|                    | GAEE | 10 | 7.64 ± 1.59  |                |                   | PFA GAEE              | n.s.              | P = 0.3518                |
| Fig.S1A<br>VIAAT   | PFA  | 10 | 1.00 ± 0.02  |                |                   | One-way ANOVA         | F (4, 45) = 26.48 | PFA, G, GAA, GE, GAEE     |

|                     |         |    |             |               |                   |  |                                 |      |                    |
|---------------------|---------|----|-------------|---------------|-------------------|--|---------------------------------|------|--------------------|
|                     | G       | 10 | 2.78 ± 0.16 |               |                   |  | PFA G                           | **** | $P_{adj} < 0.0001$ |
|                     | GAA     | 10 | 2.43 ± 0.20 |               |                   |  | PFA GAA                         | **** | $P_{adj} < 0.0001$ |
|                     | GE      | 10 | 1.59 ± 0.09 |               |                   |  | PFA GE                          | *    | $P = 0.0176$       |
|                     | GAAE    | 10 | 1.48 ± 0.17 |               |                   |  | PFA GAAE                        | n.s. | $P = 0.0667$       |
| Fig. S2F<br>Cx      | PFA     | 6  | 1.00 ± 0.02 | One-way ANOVA | F (4, 25) = 174.8 |  | PFA, 3G0.8A, 3G8A, 9G0.8A, 9G8A | **** | $P_{adj} < 0.0001$ |
|                     | 3G 0.8A | 6  | 3.90 ± 0.11 |               |                   |  | PFA 3G0.8A                      | **** | $P_{adj} < 0.0001$ |
|                     | 3G 8A   | 6  | 3.71 ± 0.07 |               |                   |  | PFA 3G8A                        | **** | $P_{adj} < 0.0001$ |
|                     | 9G 0.8A | 6  | 3.85 ± 0.14 |               |                   |  | PFA 9G0.8A                      | **** | $P_{adj} < 0.0001$ |
|                     | 9G 8A   | 6  | 4.05 ± 0.10 |               |                   |  | PFA 9G8A                        | **** | $P_{adj} < 0.0001$ |
| Fig. S2F<br>St      | PFA     | 6  | 1.00 ± 0.04 | One-way ANOVA | F (4, 25) = 11.40 |  | PFA, 3G0.8A, 3G8A, 9G0.8A, 9G8A | **** | $P_{adj} < 0.0001$ |
|                     | 3G 0.8A | 6  | 2.99 ± 0.22 |               |                   |  | PFA 3G0.8A                      | **** | $P_{adj} < 0.0001$ |
|                     | 3G 8A   | 6  | 2.42 ± 0.36 |               |                   |  | PFA 3G8A                        | **   | $P = 0.0037$       |
|                     | 9G 0.8A | 6  | 2.89 ± 0.22 |               |                   |  | PFA 9G0.8A                      | ***  | $P = 0.0001$       |
|                     | 9G 8A   | 6  | 2.92 ± 0.28 |               |                   |  | PFA 9G8A                        | **** | $P_{adj} < 0.0001$ |
| Fig. S3D<br>PSD-95  | Cx      |    |             | One-way ANOVA | F (2, 27) = 377.0 |  | 4%PFA, 1%PFA, GAA               | **** | $P_{adj} < 0.0001$ |
|                     | 4% PFA  | 10 | 1.00 ± 0.05 |               |                   |  | 4%PFA 1%PFA                     | ***  | $P = 0.0003$       |
|                     | 1% PFA  | 10 | 1.53 ± 0.03 |               |                   |  | 4%PFA GAA                       | **** | $P_{adj} < 0.0001$ |
|                     | GAA     | 10 | 4.02 ± 0.13 |               |                   |  | 1%PFA GAA                       | **** | $P_{adj} < 0.0001$ |
|                     | St      |    |             | One-way ANOVA | F (2, 27) = 162.3 |  | 4%PFA, 1%PFA, GAA               | **** | $P_{adj} < 0.0001$ |
|                     | 4% PFA  | 10 | 1.00 ± 0.04 |               |                   |  | 4%PFA 1%PFA                     | n.s. | $P = 0.9011$       |
|                     | 1% PFA  | 10 | 1.07 ± 0.04 |               |                   |  | 4%PFA GAA                       | **** | $P_{adj} < 0.0001$ |
|                     | GAA     | 10 | 3.51 ± 0.19 |               |                   |  | 1%PFA GAA                       | **** | $P_{adj} < 0.0001$ |
| Fig. S3H<br>SAP-102 | Cx      |    |             | One-way ANOVA | F (2, 27) = 484.1 |  | 4%PFA, 1%PFA, GAA               | **** | $P_{adj} < 0.0001$ |
|                     | 4% PFA  | 10 | 1.00 ± 0.03 |               |                   |  | 4%PFA 1%PFA                     | **** | $P_{adj} < 0.0001$ |
|                     | 1% PFA  | 10 | 1.65 ± 0.05 |               |                   |  | 4%PFA GAA                       | **** | $P_{adj} < 0.0001$ |
|                     | GAA     | 10 | 2.97 ± 0.05 |               |                   |  | 1%PFA GAA                       | **** | $P_{adj} < 0.0001$ |
|                     | Hi      |    |             | One-way ANOVA | F (2, 27) = 570.9 |  | 4%PFA, 1%PFA, GAA               | **** | $P_{adj} < 0.0001$ |
|                     | 4% PFA  | 10 | 1.00 ± 0.08 |               |                   |  | 4%PFA 1%PFA                     | n.s. | $P = 0.2041$       |



|          |                                         |                    |                                        |                 |                                  |              |      |                    |
|----------|-----------------------------------------|--------------------|----------------------------------------|-----------------|----------------------------------|--------------|------|--------------------|
|          | 1% PFA                                  | 10                 | 1.29 ± 0.04                            |                 |                                  | 4%PFA<br>GAA | **** | $P_{adj} < 0.0001$ |
|          | GAA                                     | 10                 | 6.00 ± 0.18                            |                 |                                  | 1%PFA<br>GAA | **** | $P_{adj} < 0.0001$ |
| Fig. S5D |                                         | PFA (6), GAA (6)   | PFA (1.00 ± 0.06), GAA (4.41 ± 0.81)   | Unpaired t-test | t = 4.201, df = 10 (Two-tailed)  | PFA<br>GAA   | **   | P = 0.0018         |
| Fig. S8E |                                         | PFA (6), GAA (6)   | PFA (1.00 ± 0.08), GAA (4.25 ± 0.96)   | Unpaired t-test | t = 3.359, df = 10 (Two-tailed)  | PFA<br>GAA   | **   | P = 0.0073         |
| Fig. S8F | GluD2 clusters /100 μm <sup>2</sup>     | PFA (6), GAA (6)   | PFA (0.12 ± 0.01), GAA (0.14 ± 0.01)   | Unpaired t-test | t = 2.016, df = 10 (Two-tailed)  | PFA<br>GAA   | n.s. | P = 0.0715         |
|          | Size of clusters (100 μm <sup>2</sup> ) | PFA (6), GAA (6)   | PFA (0.63 ± 0.09), GAA (2.49 ± 0.491)  | Unpaired t-test | t = 3.739, df = 10 (Two-tailed)  | PFA<br>GAA   | **   | P = 0.0039         |
| Fig. S9  | Nav1.1-1.9                              | PFA (10), GAA (10) | PFA (1.00 ± 0.18), GAA (85.61 ± 27.96) | Unpaired t-test | t = 3.026, df = 18 (Two-tailed)  | PFA<br>GAA   | **   | P = 0.0073         |
|          | Kv1.1                                   | PFA (10), GAA (10) | PFA (1.00 ± 0.04), GAA (12.41 ± 1.05)  | Unpaired t-test | t = 10.86, df = 18 (Two-tailed)  | PFA<br>GAA   | **** | $P_{adj} < 0.0001$ |
|          | Cav2.1                                  | PFA (10), GAA (10) | PFA (1.00 ± 0.12), GAA (16.81 ± 4.65)  | Unpaired t-test | t = 3.399, df = 18 (Two-tailed)  | PFA<br>GAA   | **   | P = 0.0032         |
| Fig. S10 | TARP-γ2                                 | PFA (10), GAA (10) | PFA (1.00 ± 0.04), GAA (22.03 ± 6.42)  | Unpaired t-test | t = 3.275, df = 18 (Two-tailed)  | PFA<br>GAA   | **   | P = 0.0042         |
|          | TARP-γ8                                 | PFA (10), GAA (10) | PFA (1.00 ± 0.04), GAA (3.37 ± 0.35)   | Unpaired t-test | t = 6.702, df = 18 (Two-tailed)  | PFA<br>GAA   | **** | $P_{adj} < 0.0001$ |
|          | Shank2                                  | PFA (10), GAA (10) | PFA (1.00 ± 0.05), GAA (5.06 ± 0.79)   | Unpaired t-test | t = 5.156, df = 18 (Two-tailed)  | PFA<br>GAA   | **** | $P_{adj} < 0.0001$ |
|          | Homer-1                                 | PFA (10), GAA (10) | PFA (1.00 ± 0.05), GAA (2.81 ± 0.20)   | Unpaired t-test | t = 8.811, df = 18 (Two-tailed)  | PFA<br>GAA   | **** | $P_{adj} < 0.0001$ |
|          | gephyrin                                | PFA (10), GAA (10) | PFA (1.00 ± 0.07), GAA (3.99 ± 0.42)   | Unpaired t-test | t = 6.955, df = 18 (Two-tailed)  | PFA<br>GAA   | **** | $P_{adj} < 0.0001$ |
|          | ankyrin-G                               | PFA (10), GAA (10) | PFA (1.00 ± 0.03), GAA (3.71 ± 0.39)   | Unpaired t-test | t = 6.936, df = 18 (Two-tailed)  | PFA<br>GAA   | **** | $P_{adj} < 0.0001$ |
| Fig. S11 | mGluR1                                  | PFA (10), GAA (10) | PFA (1.00 ± 0.04), GAA (0.85 ± 0.12)   | Unpaired t-test | t = 1.250, df = 18 (Two-tailed)  | PFA<br>GAA   | n.s. | P = 0.2271         |
|          | GABA <sub>B</sub> R2                    | PFA (10), GAA (10) | PFA (1.00 ± 0.02), GAA (9.65 ± 2.37)   | Unpaired t-test | t = 3.648, df = 18 (Two-tailed)  | PFA<br>GAA   | **   | P = 0.0018         |
|          | mAChR1                                  | PFA (10), GAA (10) | PFA (1.00 ± 0.02), GAA (0.95 ± 0.13)   | Unpaired t-test | t = 0.3863, df = 18 (Two-tailed) | PFA<br>GAA   | n.s. | P = 0.7038         |
|          | D1R                                     | PFA (10), GAA (10) | PFA (1.00 ± 0.05), GAA (2.70 ± 0.31)   | Unpaired t-test | t = 5.416, df = 18 (Two-tailed)  | PFA<br>GAA   | **** | $P_{adj} < 0.0001$ |

|          |                    |                    |                                            |                 |                                 |            |      |                    |
|----------|--------------------|--------------------|--------------------------------------------|-----------------|---------------------------------|------------|------|--------------------|
|          | IP <sub>3</sub> R1 | PFA (10), GAA (10) | PFA (1.00 ± 0.40), GAA (17519.80 ± 717.84) | Unpaired t-test | t = 24.40, df = 18 (Two-tailed) | PFA<br>GAA | **** | $P_{adj} < 0.0001$ |
|          | PLCβ1              | PFA (10), GAA (10) | PFA (1.00 ± 0.09), GAA (52.08 ± 6.68)      | Unpaired t-test | t = 7.641, df = 18 (Two-tailed) | PFA<br>GAA | **** | $P_{adj} < 0.0001$ |
| Fig. S12 | VGluT1             | PFA (10), GAA (10) | PFA (1.00 ± 0.05), GAA (1.42 ± 0.10)       | Unpaired t-test | t = 3.556, df = 18 (Two-tailed) | PFA<br>GAA | **   | $P = 0.0023$       |
|          | VGluT2             | PFA (10), GAA (10) | PFA (1.00 ± 0.03), GAA (4.45 ± 0.65)       | Unpaired t-test | t = 5.332, df = 18 (Two-tailed) | PFA<br>GAA | **** | $P_{adj} < 0.0001$ |
|          | VGluT3             | PFA (10), GAA (10) | PFA (1.00 ± 0.04), GAA (12.01 ± 2.38)      | Unpaired t-test | t = 4.624, df = 18 (Two-tailed) | PFA<br>GAA | ***  | $P = 0.0002$       |
|          | VIAAT              | PFA (10), GAA (10) | PFA (1.00 ± 0.08), GAA (1.65 ± 0.16)       | Unpaired t-test | t = 3.653, df = 18 (Two-tailed) | PFA<br>GAA | **   | $P = 0.0018$       |
|          | VACHT              | PFA (10), GAA (10) | PFA (1.00 ± 0.02), GAA (3.92 ± 0.61)       | Unpaired t-test | t = 4.762, df = 18 (Two-tailed) | PFA<br>GAA | ***  | $P = 0.0002$       |
|          | VMAT2              | PFA (10), GAA (10) | PFA (1.00 ± 0.04), GAA (12.53 ± 1.93)      | Unpaired t-test | t = 5.973, df = 18 (Two-tailed) | PFA<br>GAA | **** | $P_{adj} < 0.0001$ |
| Fig. S13 | GLAST              | PFA (10), GAA (10) | PFA (1.00 ± 0.06), GAA (1.92 ± 0.13)       | Unpaired t-test | t = 6.373, df = 18 (Two-tailed) | PFA<br>GAA | **** | $P_{adj} < 0.0001$ |
|          | GAT1               | PFA (10), GAA (10) | PFA (1.00 ± 0.06), GAA (5.37 ± 0.24)       | Unpaired t-test | t = 18.06, df = 18 (Two-tailed) | PFA<br>GAA | **** | $P_{adj} < 0.0001$ |
|          | GlyT2              | PFA (10), GAA (10) | PFA (1.00 ± 0.03), GAA (1.69 ± 0.06)       | Unpaired t-test | t = 10.12, df = 18 (Two-tailed) | PFA<br>GAA | **** | $P_{adj} < 0.0001$ |
|          | CHT                | PFA (10), GAA (10) | PFA (1.00 ± 0.08), GAA (8.86 ± 2.43)       | Unpaired t-test | t = 3.234, df = 18 (Two-tailed) | PFA<br>GAA | **   | $P = 0.0046$       |
|          | DAT                | PFA (10), GAA (10) | PFA (1.00 ± 0.03), GAA (3.09 ± 0.52)       | Unpaired t-test | t = 4.007, df = 18 (Two-tailed) | PFA<br>GAA | ***  | $P = 0.0008$       |
|          | NET                | PFA (10), GAA (10) | PFA (1.00 ± 0.03), GAA (2.30 ± 0.11)       | Unpaired t-test | t = 10.98, df = 18 (Two-tailed) | PFA<br>GAA | **** | $P_{adj} < 0.0001$ |
|          | HTT                | PFA (10), GAA (10) | PFA (1.00 ± 0.05), GAA (4.96 ± 0.83)       | Unpaired t-test | t = 4.735, df = 18 (Two-tailed) | PFA<br>GAA | ***  | $P = 0.0002$       |
| Fig. S14 | Bassoon            | PFA (10), GAA (10) | PFA (1.00 ± 0.17), GAA (32.33 ± 9.81)      | Unpaired t-test | t = 3.192, df = 18 (Two-tailed) | PFA<br>GAA | **   | $P = 0.0050$       |
|          | CAST               | PFA (10), GAA (10) | PFA (1.00 ± 0.28), GAA (1490.61 ± 500.46)  | Unpaired t-test | t = 2.976, df = 18 (Two-tailed) | PFA<br>GAA | **   | $P = 0.0081$       |
|          | synapsin-1         | PFA (10), GAA (10) | PFA (1.00 ± 0.04), GAA (0.93 ± 0.05)       | Unpaired t-test | t = 1.137, df = 18 (Two-tailed) | PFA<br>GAA | n.s. | $P = 0.2703$       |
| Fig. S15 | Cbln1              | PFA (10), GAA (10) | PFA (1.00 ± 0.06), GAA (1.50 ± 0.06)       | Unpaired t-test | t = 5.948, df = 18 (Two-tailed) | PFA<br>GAA | **** | $P_{adj} < 0.0001$ |

|          |                  |                    |                                             |                 |                                  |            |      |                    |
|----------|------------------|--------------------|---------------------------------------------|-----------------|----------------------------------|------------|------|--------------------|
|          | Cbln3            | PFA (10), GAA (10) | PFA (1.00 ± 0.34), GAA (23903.08 ± 8088.47) | Unpaired t-test | t = 2.955, df = 18 (Two-tailed)  | PFA<br>GAA | **   | P = 0.0085         |
|          | Nrxn1α           | PFA (10), GAA (10) | PFA (1.00 ± 0.10), GAA (148.59 ± 47.07)     | Unpaired t-test | t = 3.136, df = 18 (Two-tailed)  | PFA<br>GAA | **   | P = 0.0057         |
|          | NL2              | PFA (10), GAA (10) | PFA (1.00 ± 0.11), GAA (63.69 ± 20.22)      | Unpaired t-test | t = 3.101, df = 18 (Two-tailed)  | PFA<br>GAA | **   | P = 0.0062         |
|          | NL3              | PFA (10), GAA (10) | PFA (1.00 ± 0.35), GAA (313.79 ± 102.56)    | Unpaired t-test | t = 3.050, df = 18 (Two-tailed)  | PFA<br>GAA | **   | P = 0.0069         |
| Fig. S16 | somato<br>statin | PFA (10), GAA (10) | PFA (1.00 ± 0.04), GAA (0.35 ± 0.07)        | Unpaired t-test | t = 7.926, df = 18 (Two-tailed)  | PFA<br>GAA | **** | $P_{adj} < 0.0001$ |
|          | VIP              | PFA (10), GAA (10) | PFA (1.00 ± 0.06), GAA (1.12 ± 0.12)        | Unpaired t-test | t = 0.8594, df = 18 (Two-tailed) | PFA<br>GAA | n.s. | P = 0.4014         |
| Fig. S17 | calbindin        | PFA (10), GAA (10) | PFA (1.00 ± 0.03), GAA (1.28 ± 0.12)        | Unpaired t-test | t = 2.235, df = 18 (Two-tailed)  | PFA<br>GAA | *    | P = 0.0383         |
|          | calretinin       | PFA (10), GAA (10) | PFA (1.00 ± 0.05), GAA (7.25 ± 1.70)        | Unpaired t-test | t = 3.674, df = 18 (Two-tailed)  | PFA<br>GAA | **   | P = 0.0017         |
|          | parvalbumin      | PFA (10), GAA (10) | PFA (1.00 ± 0.04), GAA (0.80 ± 0.12)        | Unpaired t-test | t = 1.632, df = 18 (Two-tailed)  | PFA<br>GAA | n.s. | P = 0.1201         |
| Fig. S18 | Iba1             | PFA (10), GAA (10) | PFA (1.00 ± 0.05), GAA (3.16 ± 0.08)        | Unpaired t-test | t = 24.07, df = 18 (Two-tailed)  | PFA<br>GAA | **** | $P_{adj} < 0.0001$ |
|          | GFAP             | PFA (10), GAA (10) | PFA (1.00 ± 0.20), GAA (2.24 ± 0.06)        | Unpaired t-test | t = 6.025, df = 18 (Two-tailed)  | PFA<br>GAA | **** | $P_{adj} < 0.0001$ |
|          | CNPase           | PFA (10), GAA (10) | PFA (1.00 ± 0.08), GAA (9.10 ± 0.22)        | Unpaired t-test | t = 34.64, df = 18 (Two-tailed)  | PFA<br>GAA | **** | $P_{adj} < 0.0001$ |

**Table S3. Summary of improving effects by GAA fixation compared with PFA fixation.**

| <b>Ionotropic receptors</b>                                   | <b>GA/PFA</b> | <b>Plasmalemmal transporters</b>                           | <b>GA/PFA</b>     |
|---------------------------------------------------------------|---------------|------------------------------------------------------------|-------------------|
| GluA2                                                         | **            |                                                            |                   |
| GluA3                                                         | **            | GLAST                                                      | ****              |
| GluK2                                                         | **            | GAT1                                                       | ****              |
| GluN1                                                         | ****          | GlyT2                                                      | ****              |
| GluN2B                                                        | ***           | CHT                                                        | **                |
| GluN2C                                                        | ****          | DAT                                                        | ***               |
| GluD1                                                         | ****          | NET                                                        | ****              |
| GluD2                                                         | ****          | HTT                                                        | ***               |
| GABA <sub>A</sub> R $\alpha$ 1                                | **            | <b>Synaptic vesicle-associated or active zone proteins</b> | <b>GA/PFA</b>     |
| GABA <sub>A</sub> R $\gamma$ 2                                | **            |                                                            |                   |
| <b>Voltage-gated ion channels</b>                             | <b>GA/PFA</b> | Bassoon                                                    | **                |
| Nav1.1-1.9 (pan-Nav1.x)                                       | **            | CAST                                                       | **                |
| Kv1.1                                                         | ****          | synapsin-1                                                 | n.s.              |
| Cav2.1                                                        | **            | <b>Synaptic adhesion molecules</b>                         | <b>GA/PFA</b>     |
| <b>Ion channel/receptor-associated proteins</b>               | <b>GA/PFA</b> | Cbln1                                                      | ****              |
|                                                               |               | Cbln3                                                      | **                |
| TARP- $\gamma$ 2                                              | **            | Nrxn1 $\alpha$                                             | **                |
| TARP- $\gamma$ 8                                              | ****          | Neuroigin1 (NL1)                                           | ****              |
| Shank2                                                        | ****          | Neuroigin2 (NL2)                                           | **                |
| Homer-1                                                       | ****          | Neuroigin3 (NL3)                                           | **                |
| gephyrin                                                      | ****          | <b>Neuropeptides</b>                                       | <b>GA/PFA</b>     |
| ankyrin-G                                                     | ****          | somatostatin                                               | ****<br>(reduced) |
| PSD-95                                                        | ****          | VIP                                                        | n.s.              |
| SAP-102                                                       | ****          | <b>Cytosolic Ca<sup>2+</sup>-binding proteins</b>          | <b>GA/PFA</b>     |
| <b>Metabotropic receptors and related signaling molecules</b> | <b>GA/PFA</b> |                                                            |                   |
| mGluR1                                                        | n.s.          | calretinin                                                 | **                |
| GABA <sub>B</sub> R2                                          | **            | parvalbumin                                                | n.s.              |
| mAChR1                                                        | n.s.          | <b>Glial marker proteins</b>                               | <b>GA/PFA</b>     |
| D1R                                                           | ****          | Iba1                                                       | ****              |
| IP <sub>3</sub> R1                                            | ****          | GFAP                                                       | ****              |
| PLCB1                                                         | ****          | CNPase                                                     | ****              |
| <b>Vesicular transporters</b>                                 | <b>GA/PFA</b> |                                                            |                   |
| VGluT1                                                        | **            |                                                            |                   |
| VGluT2                                                        | ****          |                                                            |                   |
| VGluT3                                                        | ***           |                                                            |                   |
| VIAAT                                                         | **            |                                                            |                   |

|       |      |  |  |
|-------|------|--|--|
| VACHT | ***  |  |  |
| VMAT2 | **** |  |  |

## REFERENCES AND NOTES

1. K. Konno, M. Watanabe, Immunohistochemistry for ion channels and their interacting molecules: Tips for improving antibody accessibility, in *Receptor and Ion Channel Detection in the Brain. Methods and Protocols* (Neuromethods, Springer, 2016), vol. 110, pp. 171–178.
2. A. Lorincz, Z. Nusser, Cell-type-dependent molecular composition of the axon initial segment. *J. Neurosci.* **28**, 14329–14340 (2008).
3. A. Baude, E. Molnár, D. Latawiec, R. A. McIlhinney, P. Somogyi, Synaptic and nonsynaptic localization of the GluR1 subunit of the AMPA-type excitatory amino acid receptor in the rat cerebellum. *J. Neurosci.* **14**, 2830–2843 (1994).
4. A. Baude, Z. Nusser, E. Molnár, R. A. McIlhinney, P. Somogyi, High-resolution immunogold localization of AMPA type glutamate receptor subunits at synaptic and non-synaptic sites in rat hippocampus. *Neuroscience* **69**, 1031–1055 (1995).
5. M. Watanabe, M. Fukaya, K. Sakimura, T. Manabe, M. Mishina, Y. Inoue, Selective scarcity of NMDA receptor channel subunits in the stratum lucidum (mossy fibre-recipient layer) of the mouse hippocampal CA3 subfield. *Eur. J. Neurosci.* **10**, 478–487 (1998).
6. J. M. Fritschy, O. Weinmann, A. Wenzel, D. Benke, Synapse-specific localization of NMDA and GABA<sub>A</sub> receptor subunits revealed by antigen-retrieval immunohistochemistry. *J. Comp. Neurol.* **390**, 194–210 (1998).
7. A. Lorincz, Z. Nusser, Molecular identity of dendritic voltage-gated sodium channels. *Science* **328**, 906–909 (2010).
8. M. Fukaya, M. Watanabe, Improved immunohistochemical detection of postsynaptically located PSD-95/SAP90 protein family by protease section pretreatment: A study in the adult mouse brain. *J. Comp. Neurol.* **426**, 572–586 (2000).

9. G. K. McMaster, G. G. Carmichael, Analysis of single- and double-stranded nucleic acids on polyacrylamide and agarose gels by using glyoxal and acridine orange. *Proc. Natl. Acad. Sci. U.S.A.* **74**, 4835–4838 (1977).
10. D. D. Sabatini, K. Bensch, R. J. Barnett, Cytochemistry and electron microscopy. The preservation of cellular ultrastructure and enzymatic activity by aldehyde fixation. *J. Cell Biol.* **17**, 19–58 (1963).
11. K. N. Richter, N. H. Revelo, K. J. Seitz, M. S. Helm, D. Sarkar, R. S. Saleeb, E. D'Este, J. Eberle, E. Wagner, C. Vogl, D. F. Lazaro, F. Richter, J. Coy-Vergara, G. Coceano, E. S. Boyden, R. R. Duncan, S. W. Hell, M. A. Lauterbach, S. E. Lehnart, T. Moser, T. F. Outeiro, P. Rehling, B. Schwappach, I. Testa, B. Zapiec, S. O. Rizzoli, Glyoxal as an alternative fixative to formaldehyde in immunostaining and super-resolution microscopy. *EMBO J.* **37**, 139–159 (2018).
12. T. Miyazaki, M. Fukaya, H. Shimizu, M. Watanabe, Subtype switching of vesicular glutamate transporters at parallel fibre-Purkinje cell synapses in developing mouse cerebellum. *Eur. J. Neurosci.* **17**, 2563–2572 (2003).
13. M. Uchigashima, T. Ohtsuka, K. Kobayashi, M. Watanabe, Dopamine synapse is a neuroligin-2-mediated contact between dopaminergic presynaptic and GABAergic postsynaptic structures. *Proc. Natl. Acad. Sci. U.S.A.* **113**, 4206–4211 (2016).
14. A. S. Landsend, M. Amiry-Moghaddam, A. Matsubara, L. Bergersen, S. Usami, R. J. Wenthold, O. P. Ottersen, Differential localization of delta glutamate receptors in the rat cerebellum: Coexpression with AMPA receptors in parallel fiber-spine synapses and absence from climbing fiber-spine synapses. *J. Neurosci.* **17**, 834–842 (1997).
15. K. Konno, K. Matsuda, C. Nakamoto, M. Uchigashima, T. Miyazaki, M. Yamasaki, K. Sakimura, M. Yuzaki, M. Watanabe, Enriched expression of GluD1 in higher brain regions and its involvement in parallel fiber-interneuron synapse formation in the cerebellum. *J. Neurosci.* **34**, 7412–7424 (2014).
16. C. Nakamoto, K. Konno, T. Miyazaki, E. Nakatsukasa, R. Natsume, M. Abe, M. Kawamura, Y. Fukazawa, R. Shigemoto, M. Yamasaki, K. Sakimura, M. Watanabe, Expression mapping,

- quantification, and complex formation of GluD1 and GluD2 glutamate receptors in adult mouse brain. *J. Comp. Neurol.* **528**, 1003–1027 (2020).
17. M. Watanabe, Y. Inoue, K. Sakimura, M. Mishina, Developmental changes in distribution of NMDA receptor channel subunit mRNAs. *Neuroreport* **3**, 1138–1140 (1992).
  18. M. Watanabe, Y. Inoue, K. Sakimura, M. Mishina, Distinct distributions of five N-methyl-D-aspartate receptor channel subunit mRNAs in the forebrain. *J. Comp. Neurol.* **338**, 377–390 (1993).
  19. M. Abe, M. Fukaya, T. Yagi, M. Mishina, M. Watanabe, K. Sakimura, NMDA receptor GluRepsilon/NR2 subunits are essential for postsynaptic localization and protein stability of GluRzeta1/NR1 subunit. *J. Neurosci.* **24**, 7292–7304 (2004).
  20. K. Akashi, T. Kakizaki, H. Kamiya, M. Fukaya, M. Yamasaki, M. Abe, R. Natsume, M. Watanabe, K. Sakimura, NMDA receptor GluN2B (GluR epsilon 2/NR2B) subunit is crucial for channel function, postsynaptic macromolecular organization, and actin cytoskeleton at hippocampal CA3 synapses. *J. Neurosci.* **29**, 10869–10882 (2009).
  21. K. Yamada, M. Fukaya, H. Shimizu, K. Sakimura, M. Watanabe, NMDA receptor subunits GluRepsilon1, GluRepsilon3 and GluRzeta1 are enriched at the mossy fibre-granule cell synapse in the adult mouse cerebellum. *Eur. J. Neurosci.* **13**, 2025–2036 (2001).
  22. J. G. Valtschanoff, A. Burette, R. J. Wenthold, R. J. Weinberg, Expression of NR2 receptor subunit in rat somatic sensory cortex: Synaptic distribution and colocalization with NR1 and PSD-95. *J. Comp. Neurol.* **410**, 599–611 (1999).
  23. M. Yamasaki, M. Fukaya, M. Yamazaki, H. Azechi, R. Natsume, M. Abe, K. Sakimura, M. Watanabe, TARP  $\gamma$ -2 and  $\gamma$ -8 differentially control AMPAR density across schaffer collateral/commissural synapses in the hippocampal CA1 area. *J. Neurosci.* **36**, 4296–4312 (2016).
  24. T. Takeuchi, T. Miyazaki, M. Watanabe, H. Mori, K. Sakimura, M. Mishina, Control of synaptic connection by glutamate receptor delta2 in the adult cerebellum. *J. Neurosci.* **25**, 2146–2156 (2005).



25. A. Iwakura, M. Uchigashima, T. Miyazaki, M. Yamasaki, M. Watanabe, Lack of molecular-anatomical evidence for GABAergic influence on axon initial segment of cerebellar Purkinje cells by the pinceau formation. *J. Neurosci.* **32**, 9438–9448 (2012).
26. M. Yamazaki, M. Fukaya, K. Hashimoto, M. Yamasaki, M. Tsujita, M. Itakura, M. Abe, R. Natsume, M. Takahashi, M. Kano, K. Sakimura, M. Watanabe, TARPs gamma-2 and gamma-7 are essential for AMPA receptor expression in the cerebellum. *Eur. J. Neurosci.* **31**, 2204–2220 (2010).
27. T. Miyazaki, M. Yamasaki, K. Hashimoto, M. Yamazaki, M. Abe, H. Usui, M. Kano, K. Sakimura, M. Watanabe, Ca<sub>v</sub>2.1 in cerebellar Purkinje cells regulates competitive excitatory synaptic wiring, cell survival, and cerebellar biochemical compartmentalization. *J. Neurosci.* **32**, 1311–1328 (2012).
28. K. Ichtchenko, Y. Hata, T. Nguyen, B. Ullrich, M. Missler, C. Moomaw, T. C. Südhof, Neuroligin 1: A splice site-specific ligand for beta-neurexins. *Cell* **81**, 435–443 (1995).
29. M. Yamasaki, T. Miyazaki, H. Azechi, M. Abe, R. Natsume, T. Hagiwara, A. Aiba, M. Mishina, K. Sakimura, M. Watanabe, Glutamate receptor  $\delta$ 2 is essential for input pathway-dependent regulation of synaptic AMPAR contents in cerebellar Purkinje cells. *J. Neurosci.* **31**, 3362–3374 (2011).
30. M. Watanabe, Production of high-quality antibodies for the study of receptors and ion channels, in *Receptor and Ion Channel Detection in the Brain. Methods and Protocols* (Neuromethods, Springer, 2016), vol. 110, pp. 3–18.
31. E. Miura, M. Fukaya, T. Sato, K. Sugihara, M. Asano, K. Yoshioka, M. Watanabe, Expression and distribution of JNK/SAPK-associated scaffold protein JSAP1 in developing and adult mouse brain. *J. Neurochem.* **97**, 1431–1446 (2006).
32. T. Miyazaki, M. Yamasaki, K. F. Tanaka, M. Watanabe, Compartmentalized input-output organization of Lugaro cells in the cerebellar cortex. *Neuroscience* **462**, 89–105 (2021).
33. E. Miura, K. Matsuda, J. I. Morgan, M. Yuzaki, M. Watanabe, Cbln1 accumulates and colocalizes with Cbln3 and GluRdelta2 at parallel fiber-Purkinje cell synapses in the mouse cerebellum. *Eur. J. Neurosci.* **29**, 693–706 (2009).

34. T. Iijima, E. Miura, K. Matsuda, Y. Kamekawa, M. Watanabe, M. Yuzaki, Characterization of a transneuronal cytokine family Cbln - regulation of secretion by heteromeric assembly. *Eur. J. Neurosci.* **25**, 1049–1057 (2007).
35. M. Narushima, M. Uchigashima, K. Hashimoto, M. Watanabe, M. Kano, Depolarization-induced suppression of inhibition mediated by endocannabinoids at synapses from fast-spiking interneurons to medium spiny neurons in the striatum. *Eur. J. Neurosci.* **24**, 2246–2252 (2006).
36. M. Uchigashima, M. Narushima, M. Fukaya, I. Katona, M. Kano, M. Watanabe, Subcellular arrangement of molecules for 2-arachidonoyl-glycerol-mediated retrograde signaling and its physiological contribution to synaptic modulation in the striatum. *J. Neurosci.* **27**, 3663–3676 (2007).
37. R. Ichikawa, M. Yamasaki, T. Miyazaki, K. Konno, K. Hashimoto, H. Tatsumi, Y. Inoue, M. Kano, M. Watanabe, Developmental switching of perisomatic innervation from climbing fibers to basket cell fibers in cerebellar Purkinje cells. *J. Neurosci.* **31**, 16916–16927 (2011).
38. K. Hisano, M. Watanabe, Y. Morimoto, Protective effects of the free radical scavenger edaravone against glutamate neurotoxicity in nearly pure neuronal culture. *J. Anesth.* **23**, 363–369 (2009).
39. T. Shibata, K. Yamada, M. Watanabe, K. Ikenaka, K. Wada, K. Tanaka, Y. Inoue, Glutamate transporter GLAST is expressed in the radial glia-astrocyte lineage of developing mouse spinal cord. *J. Neurosci.* **17**, 9212–9219 (1997).
40. M. Fukaya, M. Tsujita, M. Yamazaki, E. Kushiya, M. Abe, K. Akashi, R. Natsume, M. Kano, H. Kamiya, M. Watanabe, K. Sakimura, Abundant distribution of TARP  $\gamma$ -8 in synaptic and extrasynaptic surface of hippocampal neurons and its major role in AMPA receptor expression on spines and dendrites. *Eur. J. Neurosci.* **24**, 2177–2190 (2006).
41. G. G. Nagy, M. Al-Ayyan, D. Andrew, M. Fukaya, M. Watanabe, A. J. Todd, Widespread expression of the AMPA receptor GluR2 subunit at glutamatergic synapses in the rat spinal cord and phosphorylation of GluR1 in response to noxious stimulation revealed with an antigen-unmasking method. *J. Neurosci.* **24**, 5766–5777 (2004).

42. D. Yan, M. Yamasaki, C. Straub, M. Watanabe, S. Tomita, Homeostatic control of synaptic transmission by distinct glutamate receptors. *Neuron* **78**, 687–699 (2013).
43. M. Hondo, N. Furutani, M. Yamasaki, M. Watanabe, T. Sakurai, Orexin neurons receive glycinergic innervations. *PLOS ONE* **6**, e25076 (2011).
44. M. Nakamura, K. Sato, M. Fukaya, K. Araishi, A. Aiba, M. Kano, M. Watanabe, Signaling complex formation of phospholipase Cbeta4 with metabotropic glutamate receptor type 1alpha and 1,4,5-trisphosphate receptor at the perisynapse and endoplasmic reticulum in the mouse brain. *Eur. J. Neurosci.* **20**, 2929–2944 (2004).
45. J. Somogyi, A. Baude, Y. Omori, H. Shimizu, S. El Mestikawy, M. Fukaya, R. Shigemoto, M. Watanabe, P. Somogyi, GABAergic basket cells expressing cholecystokinin contain vesicular glutamate transporter type 3 (VGLUT3) in their synaptic terminals in hippocampus and isocortex of the rat. *Eur. J. Neurosci.* **19**, 552–569 (2004).
46. M. Narushima, M. Uchigashima, M. Fukaya, M. Matsui, T. Manabe, K. Hashimoto, M. Watanabe, M. Kano, Tonic enhancement of endocannabinoid-mediated retrograde suppression of inhibition by cholinergic interneuron activity in the striatum. *J. Neurosci.* **27**, 496–506 (2007).
47. J. Tanaka, S. Nakagawa, E. Kushiya, M. Yamasaki, M. Fukaya, T. Iwanaga, M. I. Simon, K. Sakimura, M. Kano, M. Watanabe, Gq protein alpha subunits Galphaq and Galpha11 are localized at postsynaptic extra-junctional membrane of cerebellar Purkinje cells and hippocampal pyramidal cells. *Eur. J. Neurosci.* **12**, 781–792 (2000).
48. M. Fukaya, M. Uchigashima, S. Nomura, Y. Hasegawa, H. Kikuchi, M. Watanabe, Predominant expression of phospholipase Cbeta1 in telencephalic principal neurons and cerebellar interneurons, and its close association with related signaling molecules in somatodendritic neuronal elements. *Eur. J. Neurosci.* **28**, 1744–1759 (2008).
49. K. Matsuda, E. Miura, T. Miyazaki, W. Kakegawa, K. Emi, S. Narumi, Y. Fukazawa, A. Ito-Ishida, T. Kondo, R. Shigemoto, M. Watanabe, M. Yuzaki, Cbln1 is a ligand for an orphan glutamate receptor delta2, a bidirectional synapse organizer. *Science* **328**, 363–368 (2010).

50. Y. Kawamura, M. Fukaya, T. Maejima, T. Yoshida, E. Miura, M. Watanabe, T. Ohno-Shosaku, M. Kano, The CB1 cannabinoid receptor is the major cannabinoid receptor at excitatory presynaptic sites in the hippocampus and cerebellum. *J. Neurosci.* **26**, 2991–3001 (2006).
